RESEARCH ARTICLE

# DFT and molecular simulation validation of the binding activity of PDEδ inhibitors for repression of oncogenic k-Ras

Taghreed A. Majrashi<sup>1</sup>, Ahmed Sabt<sup>2\*</sup>, Hadia Almahli<sup>3</sup>, Mahmoud A. El Hassab<sup>4</sup>, Mahmoud A. Noamaan<sup>5</sup>, Eslam B. Elkaeed<sup>6</sup>, Mohamed Farouk Hamissa<sup>7,8</sup>, Abdalkareem Nael Maslamani<sup>9</sup>, Moataz A. Shaldam<sup>10</sup>, Wagdy M. Eldehna<sup>10\*</sup>

**1** Department of Pharmacognosy, College of Pharmacy, King Khalid University, Asir, Saudi Arabia, **2** Chemistry of Natural Compounds Department, Pharmaceutical and Drug Industries Research Institute, National Research Centre, Dokki, Cairo, Egypt, **3** Department of Chemistry, University of Cambridge, Cambridge, United Kingdom, **4** Faculty of Pharmacy, Department of Medicinal Chemistry, King Salman International University (KSIU), South Sinai, Egypt, **5** Faculty of Science, Mathematics Department, Cairo University, Giza, Egypt, **6** Department of Pharmaceutical Sciences, College of Pharmacy, AlMaarefa University, Ad Diriyah, Riyadh, Saudi Arabia, **7** Medicinal and Pharmaceutical Chemistry Department, Pharmaceutical and Drug Industries Research Division, National Research Centre, Dokki, Giza, Egypt, **8** Institute of Organic Chemistry and Biochemistry, Academy of Sciences, Prague, Czech Republic, **9** Faculty of Medicine, Cairo University, Cairo, Egypt, **10** Faculty of Pharmacy, Department of Pharmaceutical Chemistry, Kafrelsheikh University, Kafrelsheikh, Egypt

\* [sabt.nrc@gmail.com](mailto:sabt.nrc@gmail.com) (AS); [wagdy2000@gmail.com](mailto:wagdy2000@gmail.com) (WME)

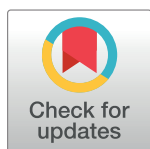

## OPEN ACCESS

**Citation:** Majrashi TA, Sabt A, Almahli H, El Hassab MA, Noamaan MA, Elkaeed EB, et al. (2024) DFT and molecular simulation validation of the binding activity of PDEδ inhibitors for repression of oncogenic k-Ras. PLoS ONE 19(3): e0300035. <https://doi.org/10.1371/journal.pone.0300035>

**Editor:** Joazaizulfazli Jamalis, Universiti Teknologi Malaysia, MALAYSIA

**Received:** October 11, 2023

**Accepted:** February 20, 2024

**Published:** March 8, 2024

**Copyright:** © 2024 Majrashi et al. This is an open access article distributed under the terms of the [Creative Commons Attribution License](https://creativecommons.org/licenses/by/4.0/), which permits unrestricted use, distribution, and reproduction in any medium, provided the original author and source are credited.

**Data Availability Statement:** All relevant data are within the manuscript and its [Supporting Information](#) files.

**Funding:** The authors would like to express their gratitude to the Deanship of Scientific Research at King Khalid University for providing financial support for this study through the Large Groups Project, grant number [RGP.2/311/44].

**Competing interests:** The authors have declared that no competing interests exist.

## Abstract

The development of effective drugs targeting the K-Ras oncogene product is a significant focus in anticancer drug development. Despite the lack of successful Ras signaling inhibitors, recent research has identified PDEδ, a KRAS transporter, as a potential target for inhibiting the oncogenic KRAS signaling pathway. This study aims to investigate the interactions between eight K-Ras inhibitors (deltarazine, deltaflexin 1 and 2, and its analogues) and PDEδ to understand their binding modes. The research will utilize computational techniques such as density functional theory (DFT) and molecular electrostatic surface potential (MESP), molecular docking, binding site analyses, molecular dynamic (MD) simulations, electronic structure computations, and predictions of the binding free energy. Molecular dynamic simulations (MD) will be used to predict the binding conformations and pharmacophoric features in the active site of PDEδ for the examined structures. The binding free energies determined using the MMPB(GB)SA method will be compared with the observed potency values of the tested compounds. This computational approach aims to enhance understanding of the PDEδ selective mechanism, which could contribute to the development of novel selective inhibitors for K-Ras signaling.

## 1. Introduction

Ras proteins, also known as small GTPases, play a vital role in the signaling network that regulates the differentiation of cells, proliferation, or survival by participating in Ras-Raf-MAPK

pathway [1,2]. Oncogenic alterations in particular amino acids, including amino acids corresponding to the codons 12, 13, and 61, are responsible for maintaining Ras in the GTP-bound form [3,4]. This results in anomalous signaling, which leads to illnesses such as tumor [5,6]. Despite extensive attempts, no direct small-molecule signaling inhibitor medication for mutant RAS has been marketed [7]. There is a high probability of K-Ras mutation in pancreatic tumors and 45% in colorectal tumors, as well as 30% in lung tumors [4,8]. Therefore, choosing the appropriate and effective therapeutic strategy against K-Ras mutant is considered of fundamental importance in medicinal chemistry [9,10].

The progression of signal transduction is contingent upon the optimal concentration of k-Ras protein centered on the membrane of the plasma (PM) [11–13]. Normally, this step is antagonized by entropic equilibration to the extensive surface of the endomembrane [10,14]. However, proteins that promote the solubilization of guanine nucleotide dissociation inhibitors (GDI), such as shuttling protein PDE $\delta$ , prevent this equilibration through binding to farnesyl moiety of k-Ras and minimizing its attachment to the internal membrane and thereby making it available to diffuse throughout the cell [15–18]. At the plasma membrane, GTP-bound Arf-like protein 2 (Arl2) is the release factor that contributes to the release of k-Ras from the PDE $\delta$  in perinuclear membranes, which is held by electrostatic interaction on the recycling endosome and then returned through vesicular transport to the PM [19]. Therefore, any disturbance in this cycle, by blocking the attachment site of k-Ras in PDE $\delta$ , could offer a different treatment approach for oncogenic signaling of KRAS [20].

**Deltarasin (I,  $K_D$  38  $\pm$  16 nM)** and **Deltazinone (II,  $K_D$  8  $\pm$  4 nM)** were the first and second generations developed by the Waldmann group to be PDE $\delta$  inhibitors with a high level of affinity, both *in vitro* and *in vivo*, at the nanomolar scale (Fig 1). Unfortunately, the major problem that appeared by both inhibitors is the release by Arl2 besides the cytotoxicity by **Deltarasin** at high concentrations (5 $\mu$ M) [21,22]. **Deltasonamides (III)**, representing the third generation of PDE $\delta$  inhibitors, could significantly withstand Arl2-mediated ejection because these molecules bind to PDE $\delta$  and form up to seven hydrogen bonds with a high affinity in the picomolar range, leading to decreased release by Arl2 [15]. Despite this, these compounds are poorly partitioned and penetrate poorly into cells. Other compounds were reported to block PDE $\delta$  and hence suppress the oncogenic k-Ras, such as premonensin-derivatives [23] besides compound **IV** which was uncovered by Leung *et al* in 2019 [24]. Through breaking the K-Ras/PDE attachment, as a result of NHTD treatment, less proliferation and apoptosis occurred in NSCLC having mutated K-Ras [25]. In 2020, Abankwa and coworkers developed a new model for inhibiting PDE $\delta$  called Deltaflexin 1, 2 and their derivatives (**V–XI**) which is characterized by selectivity against k-Ras not H-Ras. They possessed potent anti-proliferative activity on breast and colorectal tumors, as well as the ability to suppress lung and breast cancer stemness traits [15]. These compounds were able to repress around a 1000 times difference in effectiveness between *in vitro* and *in cellulo* due to presence of biodegradable cell penetration group [26,27]. It was proposed that key interactions between the hydrophobic cavity of PDE $\delta$  and the farnesyl group of Ras family alongside interactions with Arg61 and Tyr149 can put the inserted molecule into the receptor's binding site of PDE $\delta$ 's in the correct orientation [28,29]. Hydrophobic interactions with Met117 and Glu88 and hydrogen bond interaction with Glu78 are considered useful regarding the selectivity and affinity of PDE $\delta$  inhibitors [15,23,24,30].

Consequently, the aforementioned data may be utilized to develop rationally designed new PDE $\delta$  inhibitors and encourage us to study these compounds *via* combined computational approaches. This approach has been reported to design different inhibitors [31–34]. The molecular structural features of target derivatives, their importance in relation to drug-like characteristics, and the way they interact were investigated using advanced computational methods such as DFT/wB97XD, high-level calculations were performed. The wave function

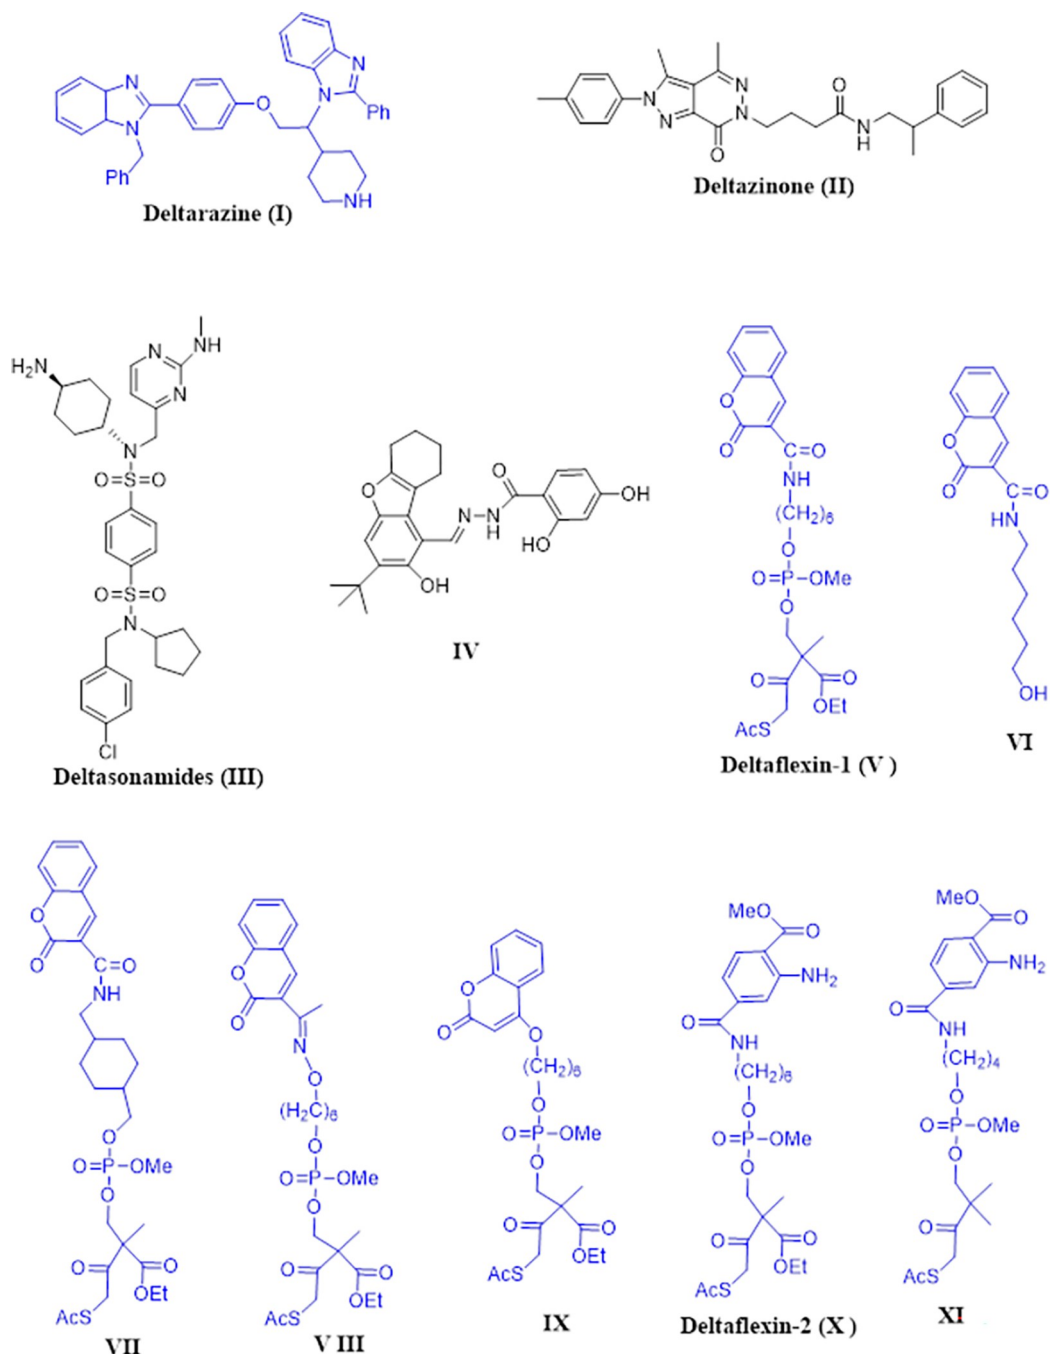

**Fig 1. Structure for some reported KRAS-PDEδ inhibitors.**

<https://doi.org/10.1371/journal.pone.0300035.g001>

representation was expanded using 6-311++G(d,p) as the basis sets. The method of DFT was employed by using wB97XD functional with 6-311++G(d,p), which can replicate empirical geometrical outcomes for computational investigations on interested eight active form derivatives. Chemical descriptors, such as chemical hardness ( $h$ ), chemical potential ( $m$ ), and electrophilicity ( $w$ ), were computed using the functionality of wB97XD in conjunction with the 6-311++G(d,p) basis set. These descriptors were employed to discern alterations in reactivity.

Using a multidimensional charge-based approach, researchers were able to understand how these compounds interact with the biologically active of the oncogenic K-Ras receptors. The study focused on analyzing the molecular electrostatic surface potential (MESP) to understand how charges are distributed on a molecule. The goal was to identify areas with potential for hydrogen bonding, as well as regions with electrophilic and nucleophilic properties. Through the utilization of reliable and accurate data and effective visual representation, we successfully identified the site of activity in these derivatives and predicted binding site and binding energy through chemical docking analysis. Investigation of the correlation between the molecular structure and the biological activity of the compounds suggested that they have favorable properties for oral bioavailability. Furthermore, we conducted MD simulations for 100 ns to examine both stability and dynamics of the ligand-receptor complexes.

## 2. Results and discussion

### 2.1. Density functional theory (DFT)

**2.1.1. Molecule orbital calculations.** Natural charges, energetics of the ground state, molecular electrostatic potential maps, naturally occurring populations of the nucleus of the suggested derivatives, also the molecular properties and reactivity descriptors of the investigated compounds were computed and examined.

**2.1.1.1. Methods benchmark.** The selection of computational approach and basis set significantly impacts the precision of calculations. The optimization of the molecular geometry of a specific hybrid coumarin derivative (VI) (refer to Fig 2) was conducted using three distinct levels of theoretical methods. From the beginning/without electron correlation, the wavefunction Schrodinger equation is used in non-electron correlated HF, along with hybrid DFT (B3LYP) [2–5] and long-range corrected (LC) DFT (wB97XD) [6], which uses the electron density approach. These methods utilize two distinct basis sets: 6–311++G (d, p) and 6–311+G (d) [7]. The table in Supplementary data, S1 Table, presents the bond lengths obtained from geometry optimization. These results are then compared with the bond lengths derived from x-ray diffraction of 3-((2-Oxo-2H-chromen-3-yl)carbonyl) pyridinium hydrogen squarate (ref. CCDC 697425)[8] in order to identify the most effective computational method for reproducing the experimental x-ray geometrical parameters. Table 1 displays a comparison of bond lengths for a specific hybrid coumarin derivative compound (VI) calculated using different methods and the 6–311++G (d, p) and 6–311+G (d) basis sets. The findings indicate that the LC-DFT (wB97XD) method demonstrates closer alignment with experimental data [8] compared to the ab initio HF and hybrid B3LYP methods. This is evident from the mean absolute deviation A% values, which are computed as the average absolute differences between the calculated and experimental values for each method and basis set, as presented in the final row of Table 1. The findings suggest that the LC-DFT/wB97XD/6–311++G (d, p) method is the most appropriate for estimating the bond length of the chosen hybrid coumarin derivative (VI). As a result, it is utilized for the remaining calculations in this study.

**2.1.2 Ground state geometric parameters.** This study aimed to provide a comprehensive analysis of the optimized geometry, dipole moment vector, numbering system, bond angles, bond lengths, and dihedral angles for all selected hybrid coumarin derivatives (V–IX), S1 Table (Supplementary data). These parameters will serve as a benchmark for evaluating the findings of this research. We have chosen specific geometric parameters to contrast the gas-phase wB97XD /6–311++G(d,p) calculations with the crystal data obtained from the X-ray structure of 3-((2-Oxo-2H-chromen-3-yl)carbonyl) pyridinium hydrogen squarate (ref. CCDC 697425) [35]. The computed mean absolute errors (MAEs) for the coumarin scaffold's selected lengths of bonds and angles are presented in S2 Table (see supplementary data). The

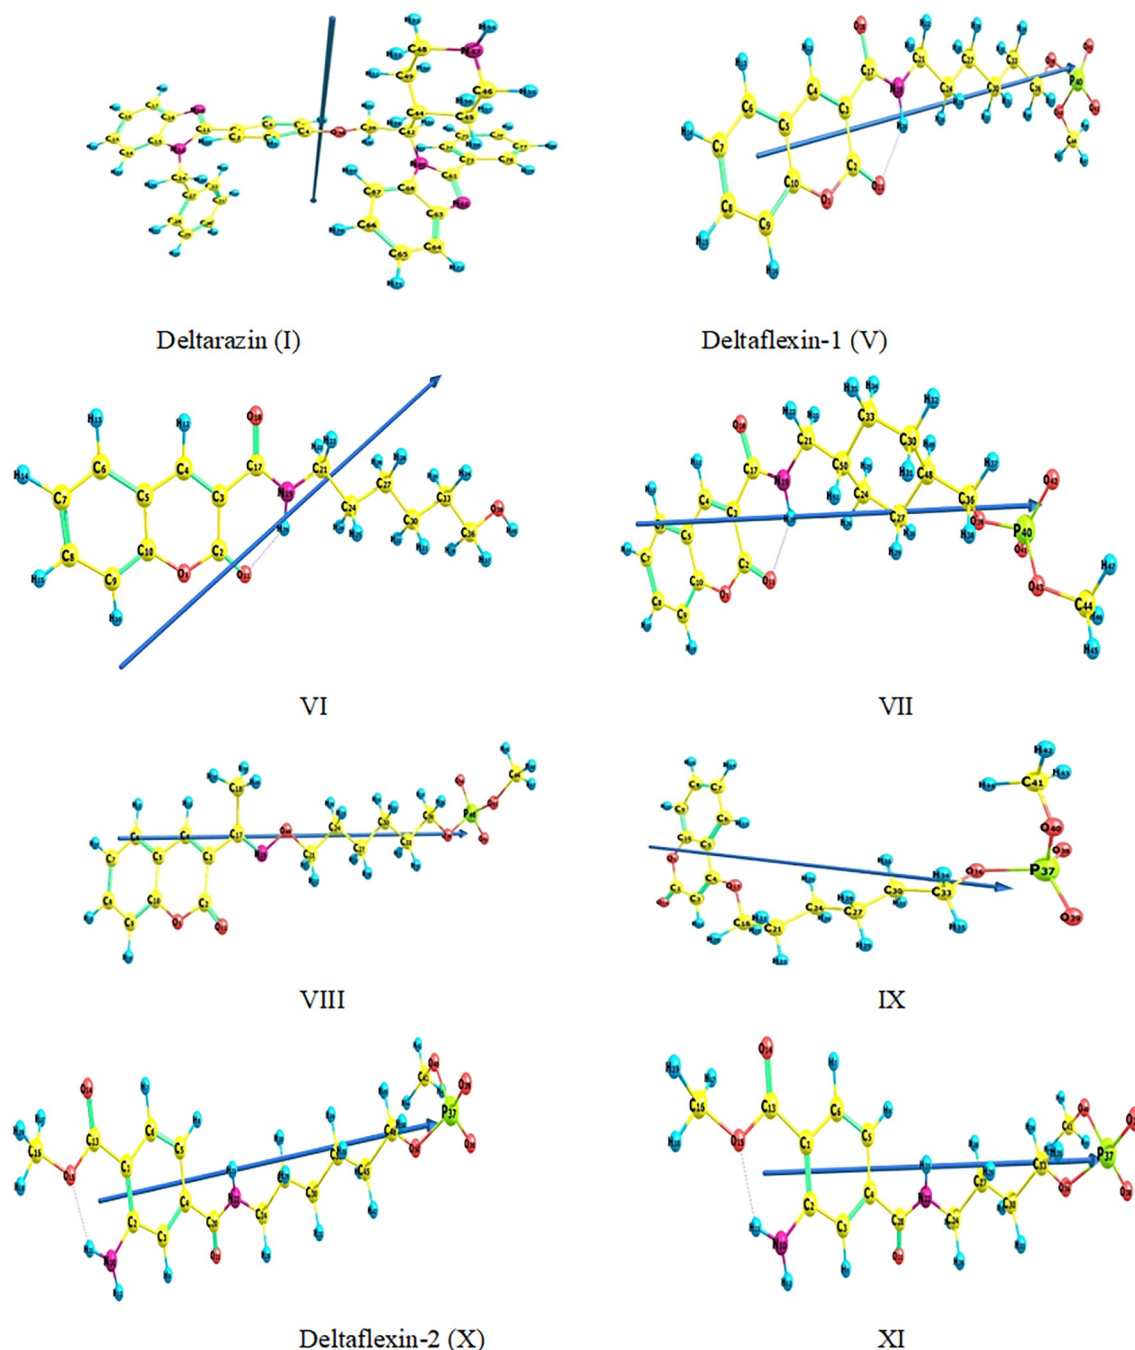

**Fig 2.** The optimal shape and momenta of the dipole vector of the potential eight target molecules (I, V-XI) were determined utilizing the wB97XD useful and 6-311++g(d,p) basis set.

<https://doi.org/10.1371/journal.pone.0300035.g002>

MAEs range for bond length was between 0.017 and 0.356 Å, and for bond angles were between 0.0 and 2.32 degrees, and for dihedral angles were between 0.09 and 2.16 degree when using wB97XD functional. In the V-IX derivatives, most of the measured lengths of bonds indicate underestimations between 0.25 and 1.1% in O1-O11 and overestimations between 1.1 and a 5.1% increase in C8-O18. Overall, there is a significant difference observed in the data from experimental finding in bond length. Analyzing the angle of the dihedral observations



**Table 1.** Displays the experimental bond length and calculated values for a specific hybrid coumarin derivative (VI) at various calculation levels.

| Parameters | Exp. [8] | 6-311++G(d,p)        |              |               | 6-311+G(d)           |              |               |
|------------|----------|----------------------|--------------|---------------|----------------------|--------------|---------------|
|            |          | <i>ab initio</i> /HF | DFT/ B3LYP   | LC-DFT/wB97XD | <i>ab initio</i> /HF | DFT/ B3LYP   | LC-DFT/wB97XD |
| R(O1,C2)   | 1.438    | 1.346                | 1.377        | 1.370         | 1.346                | 1.378        | 1.370         |
| R(O1,C10)  | 1.458    | 1.349                | 1.369        | 1.357         | 1.348                | 1.362        | 1.357         |
| R(C2,C3)   | 1.324    | 1.472                | 1.466        | 1.466         | 1.472                | 1.466        | 1.470         |
| R(C2,O11)  | 1.328    | 1.185                | 1.209        | 1.206         | 1.185                | 1.209        | 1.206         |
| R(C3,C4)   | 1.379    | 1.339                | 1.348        | 1.350         | 1.339                | 1.349        | 1.350         |
| R(C3,C17)  | 1.435    | 1.512                | 1.515        | 1.513         | 1.511                | 1.515        | 1.513         |
| R(C4,C5)   | 1.397    | 1.443                | 1.439        | 1.433         | 1.443                | 1.438        | 1.433         |
| R(C5,C6)   | 1.425    | 1.398                | 1.403        | 1.403         | 1.398                | 1.403        | 1.403         |
| R(C5,C10)  | 1.330    | 1.384                | 1.404        | 1.396         | 1.384                | 1.404        | 1.396         |
| R(C6,C7)   | 1.313    | 1.375                | 1.384        | 1.380         | 1.375                | 1.384        | 1.380         |
| R(C7,C8)   | 1.367    | 1.396                | 1.403        | 1.400         | 1.396                | 1.403        | 1.400         |
| R(C8,C9)   | 1.401    | 1.378                | 1.381        | 1.383         | 1.379                | 1.381        | 1.380         |
| R(C9,C10)  | 1.294    | 1.386                | 1.398        | 1.391         | 1.386                | 1.398        | 1.391         |
| R(C17,O18) | 1.254    | 1.214                | 1.224        | 1.222         | 1.213                | 1.224        | 1.222         |
| A%         |          | <b>5.125</b>         | <b>4.819</b> | <b>4.755</b>  | <b>5.127</b>         | <b>4.847</b> | <b>4.791</b>  |

$$A\% = \frac{\text{Mean absolute deviation of bond length}}{\text{Mean bond length of experimental values}} \times 100.$$

<https://doi.org/10.1371/journal.pone.0300035.t001>

provided in **S2 Table (see supplementary data)** shows that almost all molecules are planar except for N19-alkyl, an  $(\text{PO}_4)^{-2}$  moieties. All the selected compounds (**V-IX**) have out-of-plane components, with diffraction angles ranging from -39.3 to -42.5 degrees. The bond angles have that been determined through calculations (**S2 Table**) vary between 109.0 to 125.0 degrees, which compare nicely to a regular  $\text{SP}^3$  and  $\text{SP}^2$  hybridization geometry, respectively.

In addition, **S3 Table (see supplementary data)** presents the geometry optimization, numbering system, dipole moment vector, length of bonds, angles of bonds, and dihedral angles for **Deltarazin (I)**, **Deltaflexin-2 (X)**, and **XI** compounds (**Fig 2**), where the computations were carried out using the wB97XD/6-311++G(d,p) technique as the most accurate measure of theory. **Deltarazin (I)** contained C, N aromatic, and non-aromatic rings with single-double resonance, with bond length varying from 1.3 to 1.5 Å and bond angle varying from 105.11 to 133.0 degrees which is related to the basic concepts of hybridization of molecular orbitals. In dihedral angles, the C1-left arm of **Deltarazin** D(C6, C1, C11, N12) out of plane by 45 degrees. Benzyl moiety also out of plane D(C1,C11,N12,C24), D(C11,N12,C24,C27), D(N12,C24,C27, C32), D(O38,C39,C42,N60), D(N60,C42,C44,C45), D(C44,C45,C46,N47) and D(N60,C61, C73,C74) are 134.14, 15.05, 100.16, 80.0, 54.36, 56.55 and 47.6 degrees, respectively. **Deltaflexin-2 (X)** and **XI** compounds are so close together in geometrical structure planarity of the phenyl group with consistency in bond length, angle, and dihedral angle of C4-amide alkyl group ended by  $\text{PO}_4$  that is out of plane, and this compare nicely to a regular  $\text{SP}^2$  and  $\text{SP}^3$  hybridization geometry, respectively.

**2.1.3 Natural charges and natural population.** The target compounds' (**I, V-XI**) natural charge analysis clearly demonstrates the arrangement of electrons throughout the different subshells that constitute their orbitals at the atomic level. **S4 Table (see supplementary data)** displays the charge assessment for all target compounds utilizing 6-311++G(d,p) basis set and the wB97XD functional. The electronegative charges for (**V-XI**) are accumulated on O42, O41, O43, and O39 of the phosphate anion center, O1, O11 of the lactam ring of the coumarin scaffold, O18 and N19 of the amide group attached to C3, respectively, having values between

Table 2. Energetic parameters of selected potential eight target compounds (I, V–XI) by utilizing wb97xd/6-311++g(d,p).

| Parameters        | ET <sup>1</sup> | EHOMO <sup>1</sup> | ELUMO <sup>1</sup> | Eg <sup>2</sup> | M <sup>3</sup> | I <sup>2</sup> | A <sup>2</sup> |
|-------------------|-----------------|--------------------|--------------------|-----------------|----------------|----------------|----------------|
| Deltarazin (I)    | -1895.40573     | -0.28985           | 0.01838            | 8.39            | 0.84           | 7.89           | -0.50          |
| Deltaflexin-1 (V) | -1583.26976     | -0.16344           | 0.01172            | 4.77            | 40.64          | 4.45           | -0.32          |
| VI                | -976.77624      | -0.32911           | -0.02938           | 8.16            | 3.80           | 8.96           | 0.80           |
| VII               | -1660.69842     | -0.16625           | 0.01813            | 5.02            | 33.56          | 4.52           | -0.49          |
| VIII              | -1622.48461     | -0.16396           | 0.02195            | 5.06            | 42.07          | 4.46           | -0.60          |
| IX                | -1489.79107     | -0.17855           | 0.04865            | 6.18            | 26.51          | 4.86           | -1.32          |
| Deltaflexin-2 (X) | -1601.74485     | -0.17599           | 0.04218            | 5.94            | 40.30          | 4.79           | -1.15          |
| XI                | -1523.12089     | -0.17868           | 0.05102            | 6.25            | 33.64          | 4.86           | -1.39          |

<sup>1</sup> Data in (au) unit.<sup>2</sup> Data in (eV) unit.<sup>3</sup> Data in (D) unit.<https://doi.org/10.1371/journal.pone.0300035.t002>

-1.163 e and -0.591 e, and tending to donate the electrons. In the case of compound (I), charges are accumulated on N47, O38, N19, N62, N60 and N12, respectively, with values from -0.685 e to -0.46 e.

However, the electropositive atoms for (V–XI), such as P40, C2, C17, H20, C10 and H12, respectively have values between +2.458 e and +0.238 e and tend to accept electrons. Moving from I to XI involves a slight alteration in the inherent charge while maintaining the same sequential pattern in the electrostatic projection sequence. A thorough examination of the inherent charge distribution of the active eight target compounds is extremely beneficial in understanding the interaction between these ligands and their targets.

**2.1.4. Frontier molecular orbitals (FMOs) analysis.** According to the information provided in Table 2, Deltarazin (I) exhibited greater stability and lower reactivity, in comparison with other possible hybrids, with an energy gap value of 8.39 eV. In contrast, the hybrid Deltaflexin-1 (V), with an energy gap of 4.77 eV, exhibited the least stability and the greatest reactivity [36–38]. The remaining active forms had their energy gaps arranged in the following order: VII < VIII < Deltaflexin-2 (X) < IX < XI < VI.

Calculating the potential for ionization (I) and affinity for electrons (A) parameters enabled the estimation of the global reactivity descriptors, and this corresponds to the values of energy in (HOMO) and (LUMO) [39,40]. As stated by the data (Table 2), compound VI exhibited the greatest values of I (8.96 eV) and A (0.8 eV). The sequence of the I values for the compounds is as follows. I > XI > IX > X > VII > VIII > V. Conversely, the sequence for A values is as follows: V > VII > I > VIII > X > IX > XI. Derivatives I, V, and X exhibit strong potential as suitable candidates for engaging in interactions with other biological mechanisms that repress the activity of oncogenic k-Ras receptors. All the potential inhibitors exhibit nearly identical dispersion of HOMO and LUMO isodensity, as illustrated in Fig 3, with the exception of compounds I and VI. These two compounds display slight variations in the dispersion patterns on the coumarin cores and the benzimidazole scaffold, respectively. The dipole moment vector, in conjunction with the order norm vector, serves to indicate the pattern of the electronic transference of charge. Consequently, the synthesized compounds can be arranged in a hierarchical order as follows: I < VI < IX < VII < XI < X < V < VIII.

**2.1.5 Global reactivity descriptors.** The density functional theory (DFT) employs the electron density of a chemical system to elucidate fundamental concepts pertaining to chemical reactivity [41]. The global descriptors generated at the wb97XD functional with 6–311++G (d, p) basis set are employed to address a variety of qualitative notions in chemical reactivity

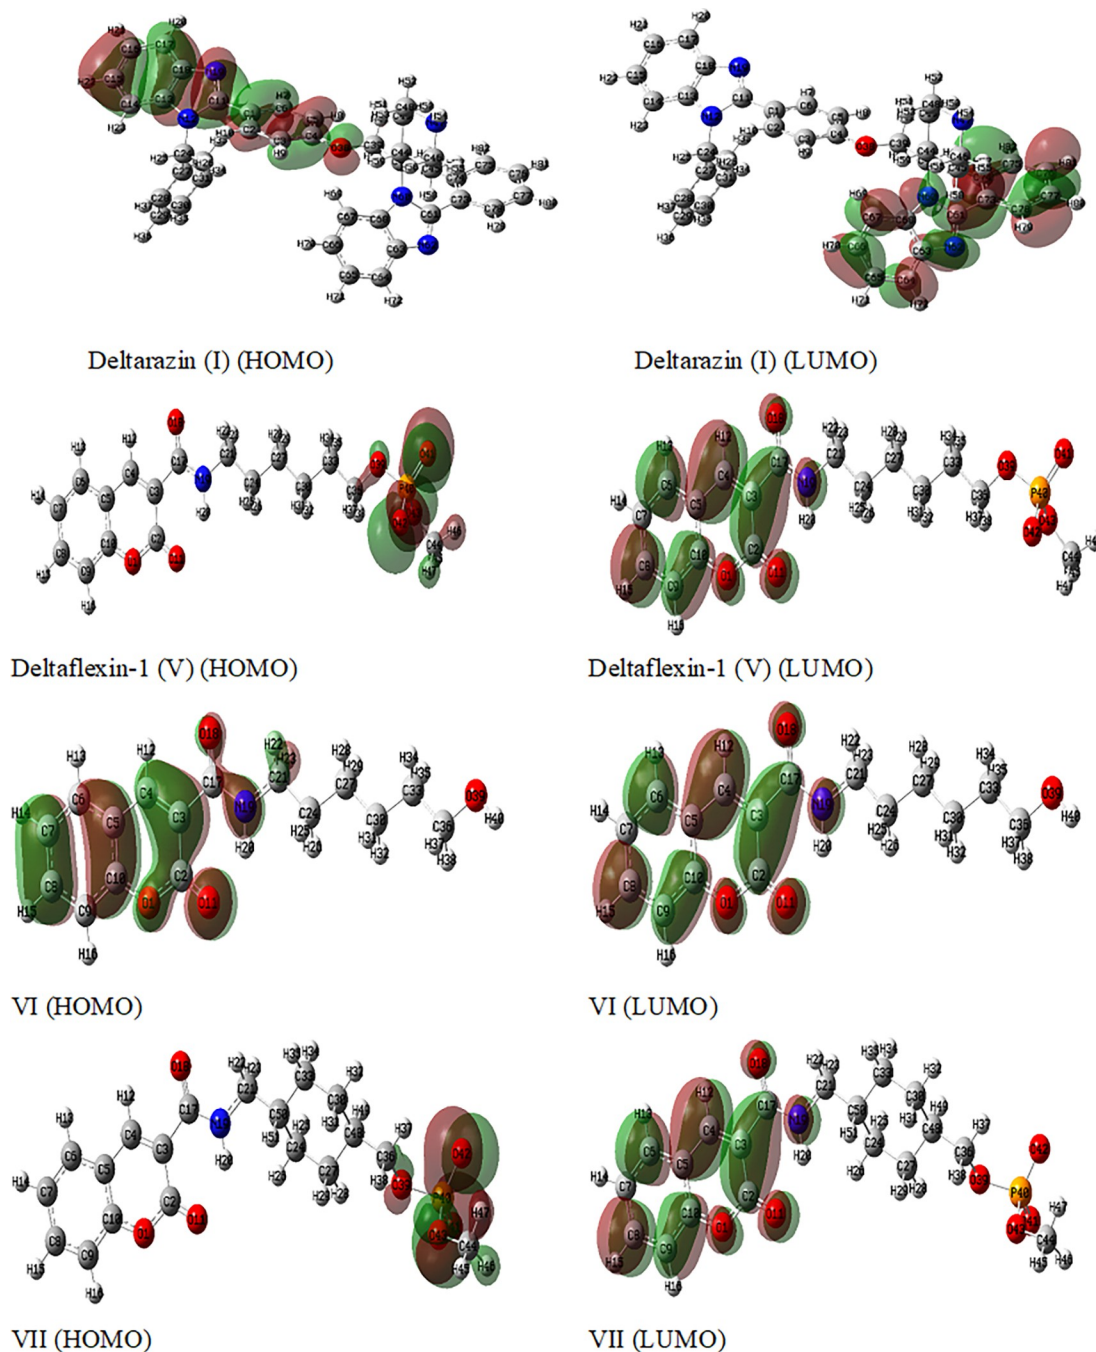

**Fig 3.** The frontier orbitals of molecules of the eight probable target compounds (I, V–XI) were examined utilizing the computational approach wb97xd/6-311++g(d,p).

<https://doi.org/10.1371/journal.pone.0300035.g003>

[42,43]. Herein, we investigated the reactivity of eight derivatives (I, V–XI). **Table 3** shows the values of descriptors which identify their reactivity or stability. Among them, compound I, “Deltarazin,” displayed the greatest value ( $\eta = 4.19$  eV), which has chemical stability, while compound V showed the minimal value ( $\eta = 2.38$  eV), indicating it has chemical reactivity. The order of chemical stability for other compounds is VII>VIII>X>IX>XI>VI. Electronic chemical potential (V) values reflect the transfer of charges in a molecule’s base state.



**Table 3.** Reactivity indices of selected potential eight target compounds (I, V-XI) using wB97XD functional with 6-311++G (d, p) basis set.

| Parameters <sup>1</sup> | X    | η    | S    | V     | Ω    | N     |
|-------------------------|------|------|------|-------|------|-------|
| Deltarazin (I)          | 3.69 | 4.19 | 0.12 | -3.69 | 1.63 | -3.68 |
| Deltaflexin-1 (V)       | 2.06 | 2.38 | 0.21 | -2.06 | 0.89 | -0.24 |
| VI                      | 4.88 | 4.08 | 0.12 | -4.88 | 2.92 | -4.74 |
| VII                     | 2.02 | 2.51 | 0.20 | -2.02 | 0.81 | -0.31 |
| VIII                    | 1.93 | 2.53 | 0.20 | -1.93 | 0.74 | -0.25 |
| IX                      | 1.77 | 3.09 | 0.16 | -1.77 | 0.51 | -0.65 |
| Deltaflexin-2 (X)       | 1.82 | 2.97 | 0.17 | -1.82 | 0.56 | -0.58 |
| XI                      | 1.74 | 3.13 | 0.16 | -1.74 | 0.48 | -0.65 |

<sup>1</sup> Data in (eV) unit.<https://doi.org/10.1371/journal.pone.0300035.t003>

According to **Table 3**, compound **XI** exhibits the highest value of -1.74 eV, while compound **VI** demonstrates the smallest value of -4.88 eV. The remaining target compounds are ranked as follows: **I, V, VII, VIII, X, and IX**.

The  $\omega$  index, which measures electrophilicity, is a thermodynamic variable that quantifies the energy variations in a chemical system as it becomes fully saturated with additional electrons. This index serves as a determinant of the reactivity of the chemical system. Compound **XI** exhibits a nucleophilic character, as evidenced by its electrophilicity index value of 0.48 eV, which is the lowest among the compounds studied. On the other hand, compound **VI** is electrophilic in nature ( $\omega = 2.92$  eV) (**Table 3**). The concept of electronegativity (X) is employed to characterize the propensity of an atom within a covalent bond to attract electrons. Compound **VI** exhibits a significantly greater affinity towards X = 4.88 eV. In the electrophilicity indices, the electronegativity (X) order among the other compounds exhibits a similar tendency. In relation to the global level of gentleness (S), compound **V** showed the highest reactivity (0.21 eV), while the remaining samples demonstrated similar levels of softness, ranging from 0.12 to 0.20 eV, in the following order: **VII, VIII, X, IX, XI, VI, and I**.

**2.1.6 Local reactivity descriptors.** Investigating a molecule's favored location and chemical reactivity has frequently involved the use of local reactivity characteristics [44,45]. The Fukui function is a tool that can be employed to examine the selectivity of molecular sites at a local level [46]. The equation represents the relationship between the first derivative of the electronic density  $\rho(r)$  with respect to the number of electrons (N) in a system while keeping the external potential  $v(r)$  constant [47].

$$f(r) = \left( \frac{\partial \rho(r)}{\partial N} \right)_{v(r)} = \frac{1}{2} \left( \frac{\partial \mu}{\partial v(r)} \right)_{v(r)},$$

By analyzing the variations in electrical density during the course of a reaction, it is possible to determine the Fukui functions, which serve to pinpoint the locations of reactivity within a system. As demonstrated in the subsequent equation, chemicals can exist in three distinct environments. The Fukui functions, denoted as  $f^+(r)$ ,  $f^-(r)$ , and  $f^0(r)$  are calculated using the formulas [48–50]:

$$f^-(r) = q_k(N) - q_k(N-1) \approx \rho^{HOMO}(r), \quad \text{for electrophilic attack}$$

$$f^+(r) = q_k(N+1) - q_k(N) \approx \rho^{LUMO}(r), \quad \text{for nucleophilic attack}$$

$$f^0(r) = \frac{1}{2}[q_k(N+1) - q_k(N-1)] \approx \frac{1}{2}[\rho^{HOMO}(r) + \rho^{LUMO}(r)], \quad \text{for Radical attack}$$

where  $q_k(N)$  is the atomic populations on the  $k_{th}$  atom for the neutral molecule, while  $q_k(N+1)$  and  $q_k(N-1)$  are the atomic population on the  $k_{th}$  atom for its anionic and cationic species, respectively. **S5** and **S6 Tables (see supplementary data)** represent the descriptor values of all compounds **I, V-XI** computed by utilizing use the 6-311++G (d, p) basis group and the wB97XD functionality. In addition, the ability to determine which atomic site in a molecule is electrophilic or nucleophilic is important in addition, Labbe and colleagues [51] proposed an extra Dual descriptor ( $\Delta f(r)$ ) The calculation can be determined by using the formula provided below:

$$\Delta f(r) = f^+(r) - f^-(r),$$

In **S5** and **S6 Tables**, the results showed that the phosphate moiety is the most electrophilic in compounds (**V, VII, VIII**) which is mostly found on the atoms: O39, P40, O41, O42, O43, and C44, but in compounds (**IX-XI**) on atoms O36, P37, O38, O39, O40 and C41. Compound **VI** has the coumarin moiety on the following atoms: O1, C3, C5, C10, and O11. In Deltarazine (**I**), it is mostly found on benzene and benzimidazole moieties atoms: C1, C2, C3, C4, C5, C6, C11, C13, C14, C15, C16, C17, C18 and N19 while the nucleophilic active site in compounds (**V, VII-IX**) The coumarin scaffold contains a functional group at a specific position O1, C2, C3, C4, C6, C8 O11 and O18 (or 17) concentrated. In case **VI** is on the selective site of the coumarin scaffold on the atoms: C2, C4, C6, C8, C9 and C17. In **X-XI**, the selective site of the benzene derivative moiety is on the atoms: C1, C4, C6, C13, C20, N10, O14, O15, O21 and N22. Finally, in Deltarazine (**I**) is mostly found on right arm C61-phenyl and benzimidazole moieties atoms: N60, C61, N62, N64, C66, C67, C68, C73, C74, C75, C76, C77 and C78. Similarly, the identical outcome can be achieved by considering the dual descriptor  $\Delta f(r)$  for both nucleophilic and electrophilic assaults. The high electronegativity of nitrogen and oxygen atoms resulted in a redistribution of electron density, besides the impact of the  $\text{PO}_3\text{-OCH}_3$  anion insertion groups in long alkyl group or derivative of phenyl alternation with benzimidazole groups, that alters these defining characteristics in all substances under investigation (**I, V-XI**).

These results align with the examination of the native population through the determination of Highest Occupied Molecular Orbital (HOMO) and Lowest Unoccupied Molecular Orbital (LUMO). Chattaraj and colleagues introduced the concept of generalized philicity, which involved the utilization of variations in condensed-to-atom Fukui functions., they created a specific measure called philicity, which is associated with a particular site  $k$  within a molecule ( $f_k^\alpha$ ), as shown in the following equation [52]:

$$\omega_k^\alpha = \omega f_k^\alpha,$$

In this context,  $\alpha = +, -$  and  $0$  correlate to local philic amounts describing the various types of assaults, including nucleophilic, electrophilic, and radical., respectively. The greatest electrophilic attribute has the largest value  $\omega_k^\alpha$  of, according to the preceding equation. Furthermore, Lee *et al.* [53] introduced various local softness measures to characterize the molecular reactivity, which can be expressed using the following equation:

$$s_k^\alpha = s f_k^\alpha,$$

In the equation mentioned above, the variable  $\alpha$  denotes the local softness values associated with alpha  $\alpha$ , positive ( $\alpha = +$ ) meaning nucleophilic, negative ( $\alpha = -$ ) electrophilic, and zero ( $\alpha$

= 0) for radical assaults. To obtain a comprehensive study, the CDFT viewpoint was used to determine the local index for both electrophilicity and nucleophilicity, compacted local softness, and percentage electrophilicity/nucleophilicity for each atom in the compounds using the software Multiwfn (version 3.7) [54]. In **S7–S10 Tables**, According to the study's findings, all the compounds studied displayed both donation and back-donating actions at the active sites, which is consistent with the Fukui functions and frontier orbital theories, these findings are presented in **S5 and S6 Tables**. The results of this study indicate that the compounds under investigation possess multiple active sites, enabling them to interact with the surface of pocket proteins through electron donation. Finally, the previously mentioned local descriptors indicate that the empirical data in this research align with the predicted changes in the effectiveness of the compounds.

**2.1.7. Molecular electrostatic potential (ESP).** The utilization of the electrostatic potential (ESP) distribution on molecular surfaces has emerged as a highly efficient method for the identification, analysis, and comprehension of patterns and phenomena [55,56]. In terms of electron density, this can be used to define a molecule's charge distribution, identify charged regions, and determine which locations are most likely to exhibit bonds of hydrogen, electrophilic, and the nucleophilic features [57]. Electrostatic potentials (ESPs) play a crucial role in the prediction and comprehension of interaction between molecules [56]. It is crucial to undertake a thorough examination of their electrostatic potential (ESPs) in order to fully comprehend the crucial interactions between the synthesized compounds and biological activity. The electrostatic potential (ESP), represented by  $V(r)$  in atomic units, is a measure of the electrostatic energy that would be exerted on a positive unit test charge located at a specific point  $(x, y, z)$  in the vicinity of the molecule. The ESP can be characterized as the energy of interaction between a proton located at a certain distance,  $r$ , and the electrical charge generated by the electrons and nuclei. In this context, negative ESPs are indicative of attractive interactions, while positive ESPs signify repulsion interactions. The electrostatic potential (ESP) distribution can be expressed using the following equation:

$$V(r) = \sum_A^{nuclei} \frac{Z_A}{|R_A - r|} - \int \frac{\rho(r')}{|r - r'|} dr',$$

in atomic units, the charge and position of nucleus A are denoted as  $Z_A$  and  $R_A$ , respectively. The electron density at position  $r'$  is represented by  $\rho(r')$ .

The active forms of target compounds are represented by surfaces that display their electrostatic potential, **Fig 4** displays the presentation of **I, V–XI**. The Multiwfn package's module for analyzing the molecular surface quantitatively allows us to divide the overall van der Waals surface into multiple fragments. This functionality allows us to examine the attributes of the ESP distribution.

Regarding compounds (**V, VII–VII**) The ESP value on the surface is significantly negative that localized on phosphate group and oxygen of lactam ring of coumarin nucleus at the O39, P40, O41, O42, O43, C44, O1 and O11 (-133.6, -108.8, -134.8, -53.01, -62.5, -62.1, -25.31 and -7.21 Kcal/mol), respectively, but sequence in compounds (**IX–XI**) localized on phosphate group with oxygen and nitrogen of phenyl derivatives -COOMe and  $NH_2$  electron withdrawing groups which decrease electron cloud on atoms O36, P37, O38, O39, O40, C41, O1 and O11 (-129.5, -106.9, -131.14, -58.5, -35.5, -78.12, -33.5 and -48.8 Kcal/mol), respectively. In compound **VI** is mainly localized on the selective site of the coumarin moiety on the atoms: O1, C3, C5, C10, O11 and O39 (-34.58, -23.06, -3.08, -8.01 and -36.43 Kcal/mol), respectively. Deltarazine (**I**) is mostly found on benzene and benzimidazole moieties atoms specifically N and O at: C1, C3, C4, C11, N12, C13, N19, O39, N60, N62 and N47 (-8.1, -14.08, -20.6, -41.5,

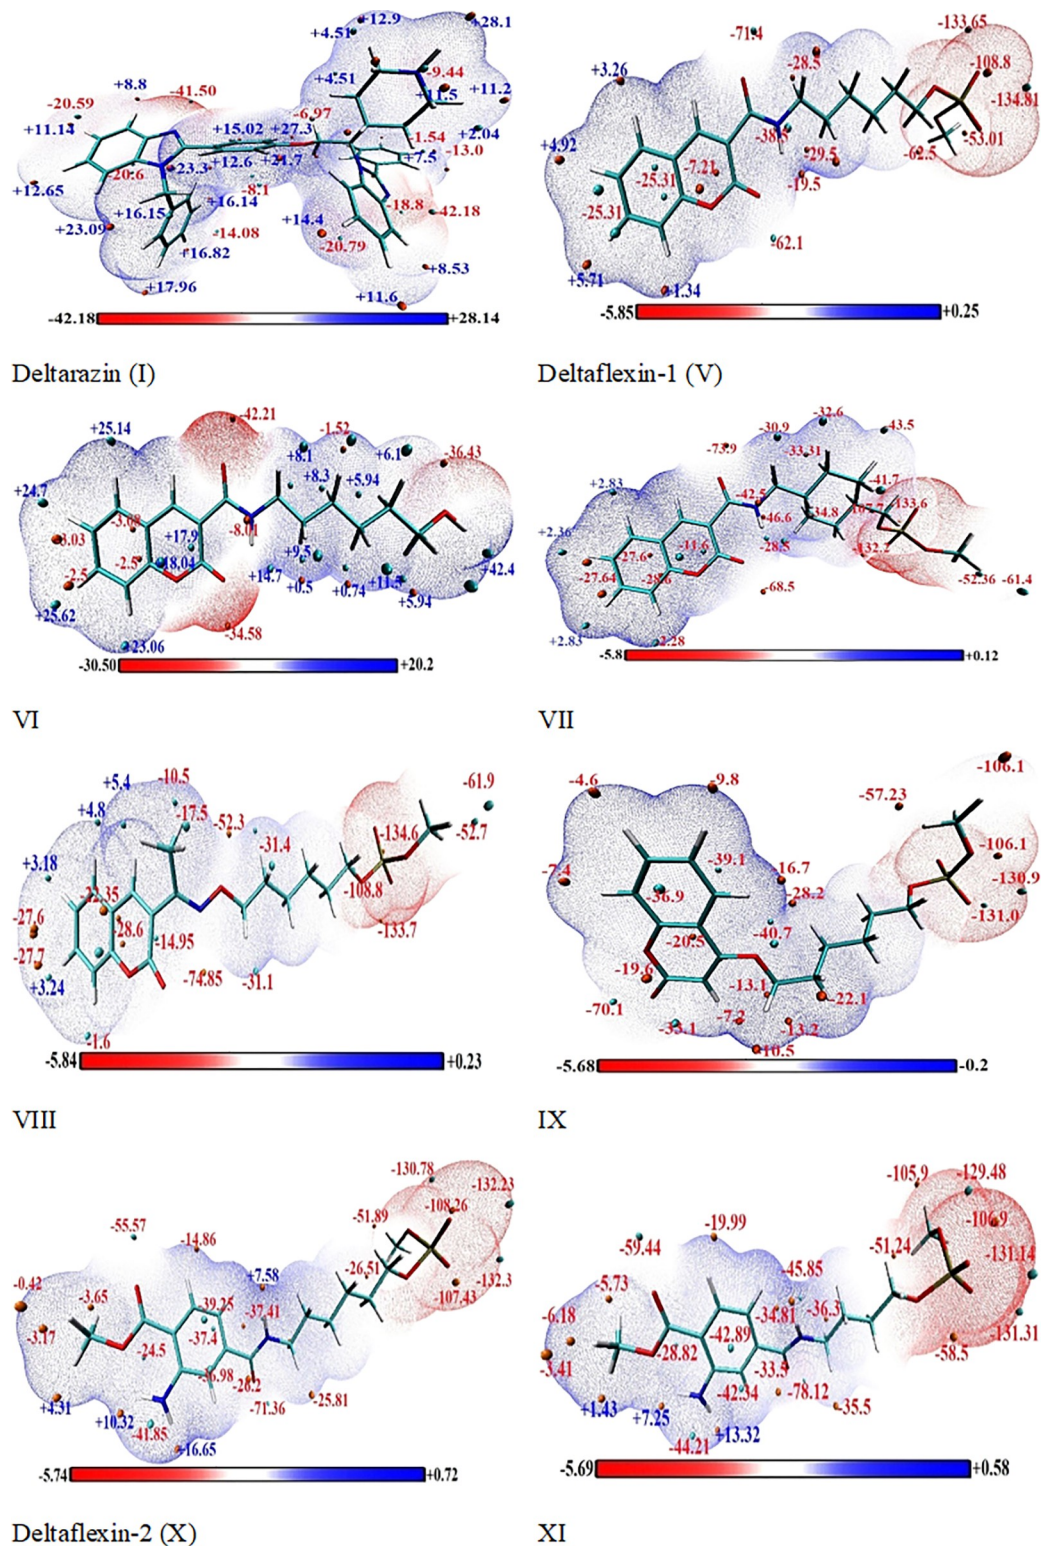

Fig 4. MEP surfaces of selected potential eight target compounds (I, V-XI) utilizing the level of computation wb97xd/6-311++g(d,p).

<https://doi.org/10.1371/journal.pone.0300035.g004>



**Table 4. Physico-chemical properties analysis and QSAR properties of selected potential eight target compounds (I, V-XI) towards PDEδ inhibitors for repression of oncogenic k-Ras.**

| Parameters        | Polarizability <sup>1</sup> | Refractivity <sup>1</sup> | Vol <sup>1</sup> | Surface area (Grid) <sup>2</sup> | HE <sup>3</sup> | Log P | MW <sup>4</sup> |
|-------------------|-----------------------------|---------------------------|------------------|----------------------------------|-----------------|-------|-----------------|
| Deltarazin (I)    | 74.09                       | 182.71                    | 1687.64          | 932.53                           | -8.19           | 8.18  | 603.77          |
| Deltaflexin-1 (V) | 35.49                       | 92.57                     | 1070.45          | 657.34                           | -10.89          | 3.63  | 382.33          |
| VI                | 31.08                       | 77.84                     | 889.28           | 551.63                           | -9.86           | 1.42  | 289.33          |
| VII               | 38.39                       | 99.71                     | 1104.51          | 675.58                           | -9.82           | 3.93  | 408.37          |
| VIII              | 37.46                       | 97.8                      | 1140.83          | 699.77                           | -11.1           | 4.54  | 396.36          |
| IX                | 32.86                       | 85.56                     | 996.99           | 609.11                           | -9.86           | 4.29  | 355.3           |
| Deltaflexin-2 (X) | 34.71                       | 95.5                      | 1109.49          | 665.85                           | -11.57          | 3.14  | 387.35          |
| XI                | 31.88                       | 86.3                      | 1001.82          | 611.64                           | -12.3           | 2.34  | 359.3           |

<sup>1</sup> Data in (Å<sup>3</sup>) unit<sup>2</sup> Data in (Å<sup>2</sup>) unit<sup>3</sup> Data in (Kcal/mol) unit<sup>4</sup> Data in (DA) unit.
<https://doi.org/10.1371/journal.pone.0300035.t004>

-20.79, -42.18 and -9.44 Kcal/mol), in the order mentioned. The carbon atom hosting the proton in the derivatives exhibits the highest energy state on the surfaces of the derivatives' derivatives (I, V-XI). The energy values range from +28.14 to +5.2 Kcal/mol for the derivatives. This suggests that the primary mode of interaction between the active forms of eight target compounds and their target receptors, to suppress oncogenic k-Ras, will be either electrostatic or hydrogen bonding. The ESP values demonstrate the capacity to form hydrogen bonds and undergo transfer charges between molecules. These results are consistent with assessments of the NBO population as well as local reactivity characteristics.

**2.1.8. Structural Activity Relationships (SAR).** In this research, the physicochemical characteristics of the targeting compounds (I, V-XI) were determined and recorded in [Table 4](#). These properties include molar volume (V), molar refractivity (MR), surface area grid (SAG), hydration energy (HE), and polarizability (Pol). The calculations were performed *via* HyperChem software (v8.0.7). molecular polarizability refers to the ability of a system of electronics to effectively respond and adapt to the influence of an outside electrical field generated by light. The importance of molecular polarizability lies in its fundamental contribution to the simulation of various compound properties and biological activities [36]. The volume of a molecule plays a crucial role in affecting different physiological functions like the penetration of the blood-brain barrier and the absorption in the intestines. Additionally, it is the primary factor that governs the polarizability of molecules. Therefore, it is imperative to incorporate molecular volume as a parameter in quantitative structure-activity relationship (QSAR) studies to model molecular properties and biological activities accurately. Another SAR characteristic that can be considered is molar refractivity (MR), which is a steric property that relies on the spatial configuration of benzene moiety in the molecules being analyzed. The spatial configuration holds great importance as it plays a critical role in comprehending the way medication molecules engage with receptors. The dispersion of London force, which plays a crucial role in the relationship among drug molecules and receptors, is an additional contributing factor to the determination of molar refractivity, in addition to its dependence on molecular volume.

According to the findings shown in [Table 4](#), it is evident that the dimensions (volume) and molecular weight (MW) of the suggested compounds exhibit a positive correlation with molecular refractivity, polarizability data, and surface area grid. Deltarazin (I) has the highest volume value (1687.64 Å<sup>3</sup>), refractivity (182.71 Å<sup>3</sup>), maximum polarizability value (74.09 Å<sup>3</sup>), surface



area grid ( $932.53 \text{ \AA}^3$ ) also, It possesses the greatest molecular weight (MW) among all substances, measuring 603.77 atomic mass units (amu). In contrast, compound VI exhibits lower values for all four parameters: polarizability, refractivity, molecular volume, molecular weight and surface area grid, with corresponding values of ( $31.08 \text{ \AA}^3$ ,  $77.84 \text{ \AA}^3$ ,  $889.28 \text{ \AA}^3$ ,  $289.33 \text{ amu}$   $551.63 \text{ \AA}^2$ ). Other chemicals' gradients within [Table 4](#) get progressively smaller as VII>VIII> **Deltaflexin-2 (X)**> **Deltaflexin-1 (V)**>IX The identical pattern is observed across all eight target compounds.

[Table 4](#) showed that the values of hydrophobicity have been rising, which causes the energy required for hydrolysis to decrease. The energy of water intake controls how stable different molecule structures are in water solutions [58,59]. The increase or reduction in hydrogen bonding (acceptors and donors) influences how the energy value of hydration changes. The exact hydration energy data ([Table 4](#)) were organized as follows: **Deltarazin (I)**<VII<IX<VI< **Deltaflexin-1 (V)**<VIII< **Deltaflexin-2 (X)**<XI with values of (-8.19, -9.82, -9.86, -9.86, -10.89, -11.1, -11.57, -12.3 Kcal/mol), in the order mentioned and are comprised of acceptors and donors for hydrogen bonding.

Numerous ADME characteristics are impacted by the lipophilic nature of compounds. Log P is a parameter that quantifies the distribution of medicinal compounds among the watery environment surrounding the cell membrane and the lipid composition of the membrane itself. This finding suggests that compounds with reduced Log P values exhibit higher polarity and lower permeability through lipid bilayers, whereas molecules with greater Log P values are less polar and exhibit reduced solubility in water [60,61]. Consequently, except for **Deltarazin (I)** which possesses a logarithmic partition coefficient (log P) of 8.18, all other compounds exhibit favorable solubility in aqueous environments. In addition, the values of Log P for target compounds **Deltarazin(I)**>VIII>IX>VII>**Deltaflexin-1 (V)**>VIII> **Deltaflexin-2 (X)**>XI>VI are in the ideal range ( $0 < \text{Log } P < 5$ ) [62]. These hybrid compounds exhibit the most effective biological activity and are easily absorbed when taken orally. The **Deltarazin (I)** compound requires a carrier for drug delivery to be deposited onto a nanomaterial with specific properties that will improve its oral bioavailability.

**2.1.9. The structure-activity relationship (SAR) for the eight derivatives studied.** The structure-activity relationship of eight compounds, as determined by biological assays, indicated that the standard compound Deltarazine (I) exhibited the highest activity may be due to the presence of the bis-benzimidazole scaffold in addition to the morpholine moiety. Deltaflexin-1 (V) also demonstrated significant activity attributed to the coumarin scaffold, while its derivative, deltaflexin-2 (X), showed increased activity (from  $4.87 \pm 0.03$  to  $3.94 \pm 0.03 \mu\text{M}$ ) upon replacement of the coumarin scaffold with the esteteramine ring. This change may act as isosters of the secondary amine pyridazine scaffold in Deltasonamides (III) compounds. Conversely, substituting the hexyl group in deltaflexin-1 with a rigid cyclohexyl moiety led to decreased activity (reaching  $6.7 \pm 0.1 \mu\text{M}$ ). Additionally, the absence of a phosphate group significantly reduced the activity of compound VI to  $18.9 \pm 0.2 \mu\text{M}$ . Furthermore, reducing the number of aliphatic groups from hexyl to pentyl and changing the leaving group resulted in decreased activity of compound XI. Finally, both derivatives of coumarin alkoxy (IX) and aminoxy (VIII) exhibited lower biological activity compared to the previous compounds.

## 2.2. In silico physicochemical properties and pharmacokinetic parameters

The compound features were generated using the Swiss ADME online method. Most of the compounds showed a high to moderate solubility profile, different lipophilicity revealed by the different Wlogp values, no blood-brain barrier permeability and high gastrointestinal (GI) absorption except for compound X which showed low GI absorption. The chemicals'

Table 5. Compound physicochemical and ADME characterization.

| Properties              | I              | V       | VI      | VII     | VIII    | IX      | X       | XI           |
|-------------------------|----------------|---------|---------|---------|---------|---------|---------|--------------|
| #Heavy atoms            | 46             | 26      | 21      | 28      | 27      | 24      | 26      | 24           |
| #Rotatable bonds        | 9              | 11      | 8       | 8       | 11      | 10      | 13      | 11           |
| #H-bond acceptors       | 4              | 7       | 4       | 7       | 8       | 7       | 7       | 7            |
| #H-bond donors          | 1              | 2       | 2       | 2       | 1       | 1       | 3       | 3            |
| MR                      | 197.64         | 96.32   | 80.68   | 103.82  | 102.67  | 89.81   | 95.96   | 86.35        |
| TPSA                    | 54.68          | 124.88  | 79.54   | 124.88  | 117.37  | 105.01  | 146.99  | 146.99       |
| WLOGP                   | 6.15           | 2.85    | 2.08    | 3.09    | 3.86    | 3.50    | 2.12    | 1.34         |
| SOL Class               | Poorly Soluble | Soluble | Soluble | Soluble | Soluble | Soluble | Soluble | Very Soluble |
| GI absorption           | High           | High    | High    | High    | High    | High    | Low     | Low          |
| BBB permeant            | No             | No      | No      | No      | No      | No      | No      | No           |
| Lipinski #violations    | 2              | 0       | 0       | 0       | 0       | 0       | 0       | 0            |
| Bioavailability Score   | 0.55           | 0.56    | 0.55    | 0.56    | 0.56    | 0.56    | 0.56    | 0.56         |
| PAINS #alerts           | 0              | 0       | 0       | 0       | 0       | 0       | 0       | 0            |
| Synthetic Accessibility | 5.99           | 3.92    | 2.85    | 4.53    | 4.57    | 4.21    | 3.29    | 3.12         |

<https://doi.org/10.1371/journal.pone.0300035.t005>

similarity to drugs was made clear by their zero violation of Lipinski's rule of five, whereas the medicinal chemistry friendliness of the compounds was confirmed by their zero PAINS alerts (pain-assay interference structural alerts). To summarize, the tested compounds could demonstrate promising lead like properties, [Table 5](#).

Those findings suggest the selected compounds possess excellent pharmacodynamics and pharmacokinetic properties making them excellent candidates for future drug optimization. Only compounds X and XI would need further optimization through adding hydrophobic substitutions.

### 2.3. Molecular docking

In this section, we aimed not only to clarify the potential ways in which the reported compounds can bind but also to compare them on the basis of docking scores, further comparing the retrieved docking scores for all the compounds with the experimental biological results against the enzyme. The docking results demonstrated a preferred binding mode for all the docked compounds, indicated by the negative binding energy score achieved by the eight compounds. More interestingly, the docking results were perfectly matched with the experimental biological assay, as demonstrated in [Table 6](#). The 2D interaction diagrams for the eight compounds with the target are represented in [Fig 5](#). Three hydrogen bonds were observed in **Deltarazine** interaction with the receptor through its nitrogen atoms in the two benzimidazole

Table 6. The binding energy score and biological activity of the eight compounds.

| Compound          | Biological activity | Score (Kcal/mol) | Residues involved in hydrogen and hydrophobic interactions                                               |
|-------------------|---------------------|------------------|----------------------------------------------------------------------------------------------------------|
| Deltarazin (I)    | 1.9 ± 0.1           | -10.67           | Cys56, Arg61, Tyr149, Met20, Ala47, Tyr52, Met117, Leu38, Ile53, Leu54, Val49, Leu38, Ile129, and Val145 |
| Deltaflexin-1 (V) | 4.87 ± 0.03         | -10.1            | Thr131, Met20, Ile53, Ile129                                                                             |
| VI                | 18.9 ± 0.2          | -9.77            | Gln78, Arg61, Thr131, Ala47and Val145                                                                    |
| VII               | 6.7 ± 0.1           | -9.98            | Gln78, Arg61, Thr131, Ile129, Ile53, Cys56, Val59, Ala111 and Val145                                     |
| VIII              | -                   | -9.3             | Gln78, Arg61, Thr131, Met20, Ile129, Met117, Ala111 and Glu88                                            |
| IX                | -                   | -9.4             | Gln78, Arg61, Thr131, Ala111, Met117 and Val80                                                           |
| Deltaflexin-2 (X) | 3.94 ± 0.03         | -10.2            | Arg61, Met20, Met117, Ile53, Leu54, Thr131, Gln78, Val59, and Ala111                                     |
| XI                | -                   | -8.91            | Arg61, Thr131, Ala111, Val59, Ile53, Leu54, and Met117                                                   |

<https://doi.org/10.1371/journal.pone.0300035.t006>

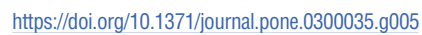

rings and piperidine ring. Furthermore, its aromatic  $\pi$  system tangled in either  $\pi$ - $\pi$  interaction with TRP90 and TRP32, sulfur- $\pi$  interaction with MET20 and MET117 or  $\pi$ -alkyl interactions. The phosphate groups in target compounds (V, VII-XI) involved in hydrogen bonds and either sulfur- $\pi$  interaction with MET20 or electrostatic attraction with ARG61 or GLU88. In addition, the coumarin ring and its carbonyl side chain in VI formed hydrogen bonds through its oxygen atoms and the ring of VIII participated in hydrogen bond interactions. Moreover, various hydrophobic interactions were seen and presented in Fig 5.

## 2.4. Molecular dynamics

The molecular dynamics technique is of important value in many drug discovery studies, including but not limited to the discovery of novel cures for emerging diseases, the characterization of the behavioral nature of macromolecules, the interpretation of amino acid mutations on drug resistance cases and the predictive estimation of the strength of binding between the drugs and their targets [63,64]. The last one was our primary goal from the molecular dynamic simulations in addition to the validation of the docking results retrieved from the docking process. The score for docking is determined using only one conformation, while the molecular dynamics calculations rely on millions of ligand-receptor conformations. Accordingly, eight molecular dynamic simulations were conducted for each compound bound to its target. The results of the molecular dynamics revealed a stable binding mode for all the ligands with their corresponding target as highlighted by the low RMSD for each complex (Fig 6).

Also, the RMSD showed fluctuations less than 1 Å from initial conformation that was retrieved from the docking. Table 7 summarizes the RMSD values of the eight complexes.

Further parameters were also computed to provide extra validation, this includes RMSF and radius of gyration (RG). The results demonstrated excellent alignment with all the insilico results, where the apo protein should high fluctuations in both RMSF and RG. In contrast, **Deltarazin (I) and to lesser extent compound VII showed excellent ability to lower the fluctuation of RG and RMSF as compared with the apo protein, Figs 7 & 8.**

## 2.5. MM-PBSA calculations

The binding free energy of the PDE $\delta$  receptor and its interaction with eight compounds was determined through the utilization of the MM-PBSA binding free energy procedure. This

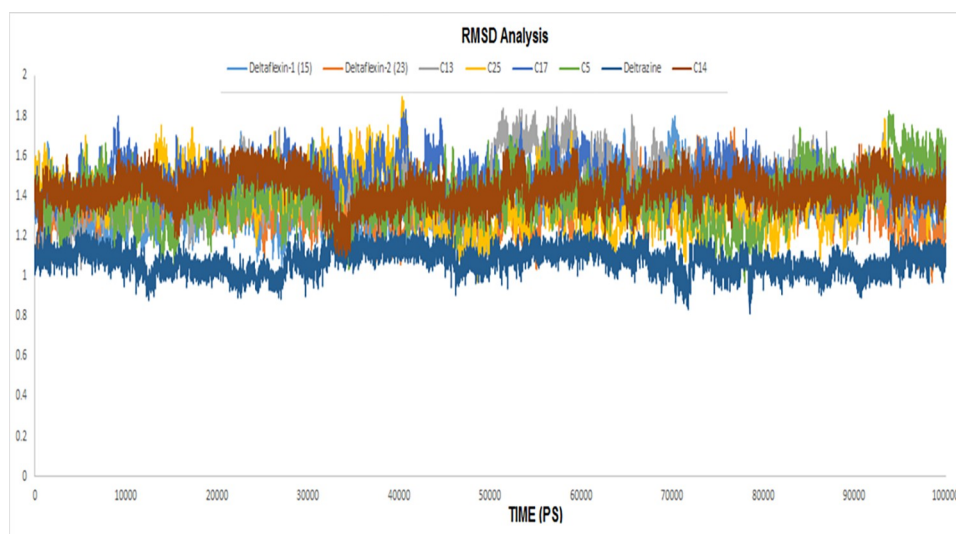

Fig 6. The RMSD analysis for the entire residues of the eight compounds in complex with their target.

<https://doi.org/10.1371/journal.pone.0300035.g006>

Table 7. The RMSD of the eight complexes at their maximum fluctuation.

| Complex           | RMSD |
|-------------------|------|
| Deltarazin (I)    | 1.24 |
| Deltaflexin-1 (V) | 1.79 |
| VI                | 1.65 |
| VII               | 1.83 |
| VIII              | 1.82 |
| IX                | 1.84 |
| Deltaflexin-2 (X) | 1.73 |
| XI                | 1.82 |

<https://doi.org/10.1371/journal.pone.0300035.t007>

approach computes the binding free energy by analyzing multiple molecular dynamics conformations stored in the trajectory file [65,66]. Therefore, the technique can be more reliable when compared to the docking study, which involves only a single conformation-based estimation. The sum of a ligand-protein complex's free energy is estimated by adding together the free energy of solvation and the potential energy from Vacuum molecular mechanics. The solvation free energy consists of two components: the polar electrostatic solvation energy and the nonpolar non-electrostatic solvation energy, which is determined using the SASA model.

**Table 8** presents an overview of all MM-PBSA outcomes and energy forms. Generally, the calculated results showed the capability of each compound to form stable complexes with PDE $\delta$  as evidenced by all eight complexes having negative favorable binding free energy. More importantly, the MD, MM-PBSA and docking results support each other, revealing the power of computational approaches and calculations in the prediction and interpretation of experimental results.

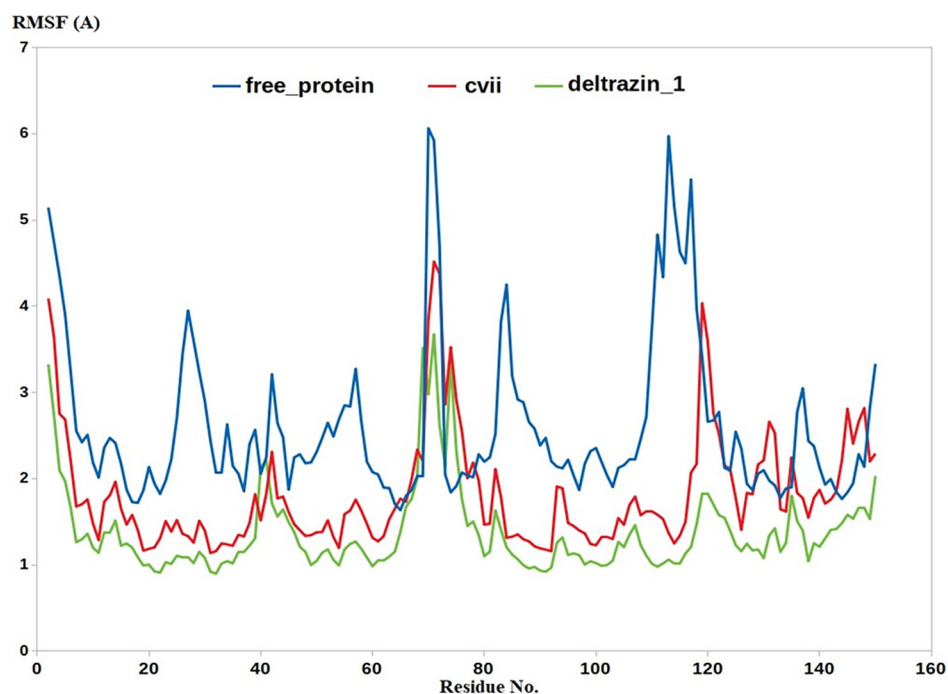

**Fig 7.** The RMSF calculation through the entire MD.

<https://doi.org/10.1371/journal.pone.0300035.g007>



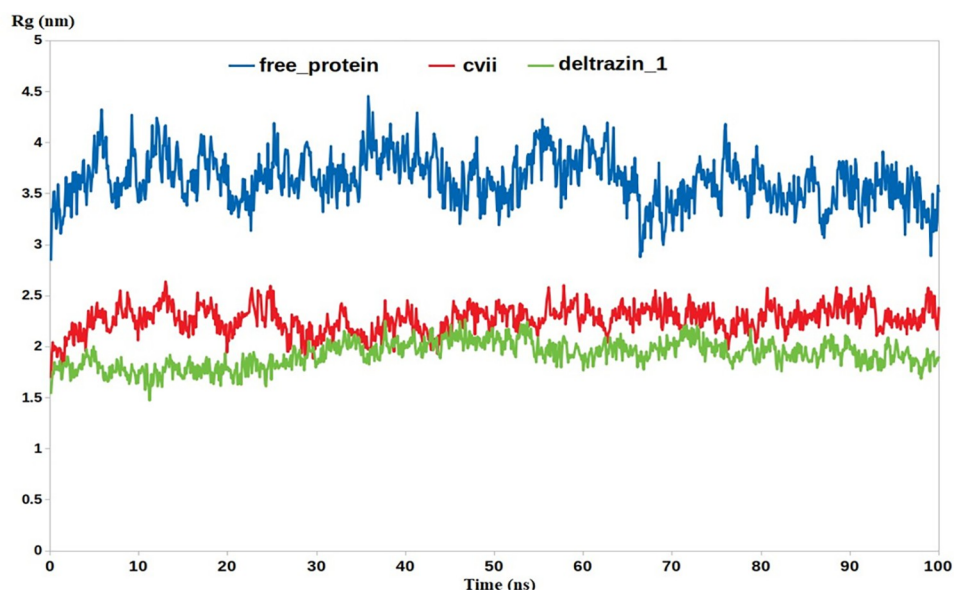

Fig 8. The RG calculation through the entire MD.

<https://doi.org/10.1371/journal.pone.0300035.g008>

### 3. Materials and methods

#### 3.1. DFT computational details

During this study, the molecular modeling calculations of k-Ras inhibitors of eight potential target derivatives were carried out using software of Gaussian 09W [67]. The molecular structure of a specific hybrid coumarin derivative (VI) was completely optimized using three different approaches. These included Hartree-Forck (HF) [1], density functional theory with the Becke's three parameter exchange functional and the gradient corrected functional of Lee, Yang and Parr (DFT/B3LYP) [2–5], and long-range corrected (LC)-DFT (wB97XD) [6], utilizing two distinct basis sets: 6–311++G (d, p) and 6–311+G (d) [7].

The target derivatives' molecular structures were subjected to geometric optimization using DFT with the wB97XD functional, which incorporates long-range corrections [68] through 6–311++G (d, p) basis set [69]. Symmetry constraints were not employed during the process of geometry optimization [70,71]. To enhance the precision, uniformity, adaptability, and overall effectiveness of Grimme's method, D2 dispersion that incorporates empirical

Table 8. MM-PBSA calculations of the binding free energy for the eight complexes.

| Complex <sup>1</sup> | $\Delta E$ binding  | $\Delta E$ Electrostatic | $\Delta E$ Vander Waal | $\Delta E$ polar solvation | SASA              |
|----------------------|---------------------|--------------------------|------------------------|----------------------------|-------------------|
| Deltarazin (I)       | $-350.58 \pm 18.53$ | $-139.05 \pm 14.67$      | $-284.13 \pm 23.84$    | $101.01 \pm 14.09$         | $-28.41 \pm 3.17$ |
| Deltaflexin-1 (V)    | $-332.92 \pm 18.33$ | $-134.72 \pm 16.11$      | $-273.94 \pm 22.82$    | $99.35 \pm 13.06$          | $-23.61 \pm 2.84$ |
| VI                   | $-313.19 \pm 16.74$ | $-129.08 \pm 15.07$      | $-247.85 \pm 21.52$    | $83.91 \pm 12.14$          | $-20.17 \pm 2.04$ |
| VII                  | $-317.25 \pm 16.27$ | $-128.49 \pm 14.80$      | $-255.17 \pm 20.14$    | $85.77 \pm 11.85$          | $-19.36 \pm 1.99$ |
| VIII                 | $-300.92 \pm 16.40$ | $-123.53 \pm 13.95$      | $-240.06 \pm 22.45$    | $79.98 \pm 10.87$          | $-17.31 \pm 2.13$ |
| IX                   | $-285.02 \pm 15.86$ | $-118.93 \pm 13.75$      | $-232.86 \pm 19.98$    | $85.19 \pm 11.76$          | $-18.42 \pm 1.87$ |
| Deltaflexin-2 (X)    | $-339.03 \pm 18.10$ | $-132.13 \pm 15.27$      | $-280.28 \pm 24.01$    | $98.77 \pm 12.78$          | $-25.39 \pm 2.25$ |
| XI                   | $-279.27 \pm 15.12$ | $-120.84 \pm 13.62$      | $-222.97 \pm 19.43$    | $80.26 \pm 10.74$          | $-15.72 \pm 1.66$ |

<sup>1</sup> Energies in (kJ/mol) unit.

<https://doi.org/10.1371/journal.pone.0300035.t008>

dispersion was employed [67–72]. The compound's respective vibrational frequencies were obtained using the previous theory, and the molecular structure of the target compounds represents actual low-energy points on the surface of potential energy. To determine the specific location of reactivity within the molecules, the wB97XD functional method was utilized to analyze descriptors of reactivity and stability at the molecular level. Based on the Fukui function and the Twin descriptor, we constructed the local reactivity descriptor [44–46,48–51].

Additionally, the Multiwfn v3.7 software program utilized to acquire the descriptors of quantum chemistry based on conceptual density functional theory (CDFT) [54]. Descriptors of quantum chemistry were employed for producing electrostatic potential (ESP) of the target compounds and viewed by the Visual Molecular Dynamics package (VMD 1.9 program) [73]. Natural Bond Orbital (NBO) analysis was obtained via NBO 3.1 in the Gaussian 09W program. The optimized structure and molecular orbitals were visualized using the program of GaussView (v6.1) [74] and ChemCraft (v1.6) software packages [59]. The SAR characteristics of the target molecules were assessed through utilizing the features of quantitative structure-activity relationship integrated into the HyperChem software (version 8.0.7) [75].

### 3.2. In silico physicochemical properties and pharmacokinetic parameters

The *SwissADME* web tool available from the Swiss Institute of Bioinformatics (SIB) was utilized to generate the physicochemical properties and pharmacokinetic parameters of the tested molecules [76,77].

### 3.3. Molecular docking

The MOE2019 software was used to perform all docking studies. The crystallographic structure of PDE $\delta$  was acquired from the Protein Data Bank with the PDB ID **4JVB** [78], and the binding site was defined based on the position of the ligand that has formed a co-crystal. The typical workflow for molecular modeling protocol was applied, beginning with preparing the receptor by adding hydrogens, adjusting charges, and minimizing energy under the AMBER12: EHT10 force field [79]. The eight compounds and co-crystallized ligand were prepared in a single file with \*.mdb extension as required by MOE 2019. The docking was performed in two stages. Firstly, the docking protocol was initially validated as the ligand that has been co-crystallized, was retrieved and re-docked to its corresponding active site. This process led to an RMSD of 0.94 Å between the co-crystallized pose and the retrieved docked pose, indicating a valid protocol for docking. In the second phase, the eight compounds were inserted into the target's binding site through docking. Discovery Studio visualizer 2019 used the docking data to create a 2D interaction graph [80].

### 3.4. Molecular dynamics

The molecular dynamics (MD) simulation experiments in this study were performed following the established protocols outlined in the published literature by our previous studies [81]. The standard procedure of running GROMACS 2020.4 software, known as GROningen Machine for Simulations of chemistry, was followed to perform eight molecular dynamic simulations of ligand-protein complexes [82]. The topologies of the eight ligands were generated and joined with the receptor topology to yield eight complexes. The solvation of the eight systems was accomplished by employing the water model known as Single Point Charge (SPC) before neutralizing them by adding suitable counter-ions. The steepest descent minimization algorithm, this technique was used to reduce the energy of all systems. This process was carried out for a maximum of 50,000 steps, ensuring that the force remained below 10.0 kJ/mol. The GRO-MOS96 43a1 force field was utilized for this purpose [83]. After minimizations of energy, all

the systems were equilibrated for 2ns of NVT ensemble simulation (constant number of particles, volume, and temperature (310 K)). An additional equilibration step was conducted, employing the NPT ensemble, which preserves a constant number of particles, temperature and pressure, within a duration of 8 nanoseconds while the long-range electrostatic was upheld [84]. Finally, balanced systems reached a production stage of 100 nanoseconds. The trajectories were monitored at regular intervals of 10 picoseconds to record the structural coordinates. Using production trajectories, RMSDs were calculated for all system residues.

### 3.5. MM-PBSA calculation

To determine the binding free energy [85], a conventional equation was employed in the following manner:

$$\Delta G_{(\text{Binding})} = G_{(\text{Complex})} - G_{(\text{Receptor})} - G_{(\text{Ligand})},$$

where,  $G_{(\text{Complex})}$ ,  $G_{(\text{Receptor})}$  and  $G_{(\text{Ligand})}$  are the total free energy of the protein–ligand complex, free enzyme and ligand in solvent, respectively (**supplementary Information**).

## 4. Conclusions

In this study, some computational techniques were used to detect the bioactivity effect of k-Ras inhibitors on the prenyl-binding pocket of protein PDEδ. The equilibrium geometries and vibrational frequencies that impact the description of the thermochemistry and subsequent calculation of the optical properties of eight k-Ras inhibitor target compounds were determined using DFT functional. According to the analysis, the results showed that the calculated binding free energies using MM-PBSA were consistent with the experimental data. The RMSD depths for Deltrazin/ PDEδ and Deltaflexin/ PDEδ are quite similar, but other inhibitors are different. The phosphate group had a crucial role in the inhibitors activity and forms stable and strong H-bond interaction with THR131, which causes the hydrophobic to be induced scaffold of coumarin close to the other residue, such as ILE 129, leading to the formation of strong hydrophobic interactions. Compared with Deltrazine there is H-bond interaction with ARG61 and TYR149 and also some hydrophobic interaction. To conclusion, these results outspread the understanding of the dissociation mechanism of PDEδ inhibitors to provide further information for the design and synthesis of improved novel KRAS-PDEδ interactions.

## Supporting information

**S1 Fig. Redocking study showing excellent superimposition between the co-crystalized and the retrieved docking pose.**

(TIF)

**S1 Table. The selected bond length (Å), bond angles and dihedral angles, (degree) of the selected potential target compounds (V-IX) of Coumarin derivatives using wb97xd/6-311++g(d,p) level of theory verses the X-ray crystal structure data (CCDC: 697425) of 3-((2-Oxo-2H-chromen-3-yl)carbonyl)pyridinium hydrogen squarate.**

(DOCX)

**S2 Table. Mean absolute errors computed for selected bond lengths (Ao) and angles (degree) of the selected potential target compounds (V-IX) of Coumarin derivative verses 3-((2-Oxo-2H-chromen-3-yl)carbonyl)pyridinium hydrogen squarate calculated at long-range corrections wb97xd/6-311++g(d,p) level of theory. The X-ray crystal structure data**

(CCDC: 697425).

(DOCX)

**S3 Table.** The selected bond length (Å), bond angles and dihedral angles, (degree) of selected potential target compounds Deltarazin and Deltaflexin derivatives (I, X- XI) using wb97xd/6-311++g(d,p) level of theory; **S4 Table:** Natural charge of selected atoms of selected potential eight target compounds (I,V-XI) by using wb97xd/6-311++g(d,p) level of theory.

(DOCX)

**S4 Table.** Natural charge of selected atoms of selected potential eight target compounds (I, V-XI) by using wb97xd/6-311++g(d,p) level of theory.

(DOCX)

**S5 Table.** Values of the Fukui functions and Dual descriptor of selected potential target compounds (V-XI) using wb97xd/6-311++g(d,p) level of theory.

(DOCX)

**S6 Table.** Values of the Fukui functions and Dual descriptor of selected potential target compounds (I, X-XI) using wb97xd/6-311++g(d,p) level of theory.

(DOCX)

**S7 Table.** Values of the Condensed local Softnesses (Hartree\*e) of selected potential target compounds (V-IX) by using wb97xd/6-311++g(d,p) level of theory from CDFT point of view.

(DOCX)

**S8 Table.** Values of the Condensed local Softnesses (Hartree\*e) of selected potential target compounds (I, X, XI) by using wb97xd/6-311++g(d,p) level of theory from CDFT point of view.

(DOCX)

**S9 Table.** Values of the Condensed local electrophilicity (EIP)/nucleophilicity (NuP) index (e\*eV) of selected potential target compounds (V-IX) by using wb97xd/6-311++g(d,p) level of theory from CDFT point of view.

(DOCX)

**S10 Table.** Values of the Condensed local electrophilicity (EIP)/nucleophilicity (NuP) index (e\*eV) of selected potential target compounds (I, X-XI) by using wb97xd/6-311++g(d,p) level of theory from CDFT point of view.

(DOCX)

## Author Contributions

**Conceptualization:** Taghreed A. Majrashi, Ahmed Sabt.

**Data curation:** Taghreed A. Majrashi, Ahmed Sabt, Hadia Almahli, Eslam B. Elkaeed, Mohamed Farouk Hamissa.

**Formal analysis:** Ahmed Sabt, Mahmoud A. El Hassab, Abdalkareem Nael Maslamani, Moataz A. Shaldam, Wagdy M. Eldehna.

**Funding acquisition:** Taghreed A. Majrashi.

**Investigation:** Mohamed Farouk Hamissa, Moataz A. Shaldam.

**Methodology:** Hadia Almahli, Mahmoud A. El Hassab, Mahmoud A. Noamaan, Mohamed Farouk Hamissa, Abdalkareem Nael Maslamani.

**Project administration:** Wagdy M. Eldehna.

**Resources:** Eslam B. Elkaeed, Moataz A. Shaldam.

**Software:** Mahmoud A. El Hassab, Mahmoud A. Noamaan.

**Supervision:** Wagdy M. Eldehna.

**Validation:** Hadia Almahli, Mahmoud A. El Hassab, Wagdy M. Eldehna.

**Visualization:** Mahmoud A. El Hassab, Mahmoud A. Noamaan, Eslam B. Elkaeed, Abdalkareem Nael Maslamani.

**Writing – original draft:** Taghreed A. Majrashi, Ahmed Sabt, Hadia Almahli, Mahmoud A. El Hassab.

**Writing – review & editing:** Eslam B. Elkaeed, Mohamed Farouk Hamissa, Abdalkareem Nael Maslamani, Moataz A. Shaldam, Wagdy M. Eldehna.

## References

1. Pylayeva-Gupta Y, Grabocka E, Bar-Sagi D. RAS oncogenes: weaving a tumorigenic web. *Nature reviews Cancer*. 2011; 11(11):761–74. Epub 2011/10/14. <https://doi.org/10.1038/nrc3106> PMID: 21993244; PubMed Central PMCID: PMC3632399.
2. Molina JR, Adjei AA. The Ras/Raf/MAPK pathway. *Journal of thoracic oncology: official publication of the International Association for the Study of Lung Cancer*. 2006; 1(1):7–9. Epub 2007/04/06. PMID: 17409820.
3. Muñoz-Maldonado C, Zimmer Y, Medová M. A Comparative Analysis of Individual RAS Mutations in Cancer Biology. *Frontiers in oncology*. 2019; 9:1088. Epub 2019/11/05. <https://doi.org/10.3389/fonc.2019.01088> PMID: 31681616; PubMed Central PMCID: PMC6813200.
4. Prior IA, Lewis PD, Mattos C. A comprehensive survey of Ras mutations in cancer. *Cancer research*. 2012; 72(10):2457–67. Epub 2012/05/17. <https://doi.org/10.1158/0008-5472.CAN-11-2612> PMID: 22589270; PubMed Central PMCID: PMC3354961.
5. Arrington AK, Heinrich EL, Lee W, Duldulao M, Patel S, Sanchez J, et al. Prognostic and predictive roles of KRAS mutation in colorectal cancer. *International journal of molecular sciences*. 2012; 13(10):12153–68. Epub 2012/12/04. <https://doi.org/10.3390/ijms131012153> PMID: 23202889; PubMed Central PMCID: PMC3497263.
6. Fernández-Medarde A, Santos E. Ras in cancer and developmental diseases. *Genes & cancer*. 2011; 2(3):344–58. Epub 2011/07/23. <https://doi.org/10.1177/1947601911411084> PMID: 21779504; PubMed Central PMCID: PMC3128640.
7. Ostrem JM, Shokat KM. Direct small-molecule inhibitors of KRAS: from structural insights to mechanism-based design. *Nature reviews Drug discovery*. 2016; 15(11):771–85. Epub 2016/11/04. <https://doi.org/10.1038/nrd.2016.139> PMID: 27469033.
8. Cox AD, Fesik SW, Kimmelman AC, Luo J, Der CJ. Drugging the undruggable RAS: Mission possible? *Nature reviews Drug discovery*. 2014; 13(11):828–51. Epub 2014/10/18. <https://doi.org/10.1038/nrd4389> PMID: 25323927; PubMed Central PMCID: PMC4355017.
9. Chan BA, Hughes BG. Targeted therapy for non-small cell lung cancer: current standards and the promise of the future. *Translational lung cancer research*. 2015; 4(1):36–54. Epub 2015/03/26. <https://doi.org/10.3978/j.issn.2218-6751.2014.05.01> PMID: 25806345; PubMed Central PMCID: PMC4367711.
10. Yelland T, Garcia E, Parry C, Kowalczyk D, Wojnowska M, Gohlke A, et al. Stabilization of the RAS: PDEδ Complex Is a Novel Strategy to Inhibit RAS Signaling. *Journal of Medicinal Chemistry*. 2022; 65(3):1898–914. <https://doi.org/10.1021/acs.jmedchem.1c01265> PMID: 35104933
11. Zhou Y, Prakash P, Gorfe AA, Hancock JF. Ras and the Plasma Membrane: A Complicated Relationship. *Cold Spring Harbor perspectives in medicine*. 2018; 8(10). Epub 2017/12/13. <https://doi.org/10.1101/cshperspect.a031831> PMID: 29229665; PubMed Central PMCID: PMC6169983.
12. Henkels KM, Rehl KM, Cho KJ. Blocking K-Ras Interaction With the Plasma Membrane Is a Tractable Therapeutic Approach to Inhibit Oncogenic K-Ras Activity. *Frontiers in molecular biosciences*. 2021;



- 8:673096. Epub 2021/07/06. <https://doi.org/10.3389/fmolb.2021.673096> PMID: 34222333; PubMed Central PMCID: PMC8244928.
13. Nair A, Kubatzky KF, Saha B. Ras Isoforms from Lab Benches to Lives—What Are We Missing and How Far Are We? *International journal of molecular sciences*. 2021; 22(12):6508. <https://doi.org/10.3390/ijms22126508> PMID: 34204435
  14. Schmick M, Vartak N, Papke B, Kovacevic M, Truxius DC, Rossmannek L, et al. KRas localizes to the plasma membrane by spatial cycles of solubilization, trapping and vesicular transport. *Cell*. 2014; 157(2):459–71. Epub 2014/04/15. <https://doi.org/10.1016/j.cell.2014.02.051> PMID: 24725411.
  15. Siddiqui FA, Alam C, Rosenqvist P, Ora M, Sabt A, Manoharan Gb, et al. PDE6D Inhibitors with a New Design Principle Selectively Block K-Ras Activity. *ACS Omega*. 2020; 5(1):832–42. <https://doi.org/10.1021/acsomega.9b03639> PMID: 31956834
  16. Zhang H, Constantine R, Frederick JM, Baehr W. The prenyl-binding protein PrBP/δ: a chaperone participating in intracellular trafficking. *Vision research*. 2012; 75:19–25. Epub 2012/09/11. <https://doi.org/10.1016/j.visres.2012.08.013> PMID: 22960045; PubMed Central PMCID: PMC3514561.
  17. Cromm PM, Spiegel J, Grossmann TN, Waldmann H. Direct Modulation of Small GTPase Activity and Function. *Angewandte Chemie*. 2015; 54(46):13516–37. <https://doi.org/10.1002/anie.201504357> PMID: 26470842
  18. Nancy V, Callebaut I, El Marjou A, de Gunzburg J. The delta subunit of retinal rod cGMP phosphodiesterase regulates the membrane association of Ras and Rap GTPases. *The Journal of biological chemistry*. 2002; 277(17):15076–84. Epub 2002/01/12. <https://doi.org/10.1074/jbc.M109983200> PMID: 11786539.
  19. Kattan WE, Hancock JF. RAS Function in cancer cells: translating membrane biology and biochemistry into new therapeutics. *The Biochemical journal*. 2020; 477(15):2893–919. Epub 2020/08/17. <https://doi.org/10.1042/BCJ20190839> PMID: 32797215; PubMed Central PMCID: PMC7891675.
  20. Gorfe AA, Cho KJ. Approaches to inhibiting oncogenic K-Ras. *Small GTPases*. 2021; 12(2):96–105. Epub 2019/08/24. <https://doi.org/10.1080/21541248.2019.1655883> PMID: 31438765; PubMed Central PMCID: PMC7849769.
  21. Khan I, Rhett JM, O'Bryan JP. Therapeutic targeting of RAS: New hope for drugging the "undruggable". *Biochimica et biophysica acta Molecular cell research*. 2020; 1867(2):118570. Epub 2019/11/05. <https://doi.org/10.1016/j.bbamcr.2019.118570> PMID: 31678118; PubMed Central PMCID: PMC6937383.
  22. Papke B, Murarka S, Vogel HA, Martín-Gago P, Kovacevic M, Truxius DC, et al. Identification of pyrazolopyridazinones as PDEδ inhibitors. *Nature communications*. 2016; 7:11360. Epub 2016/04/21. <https://doi.org/10.1038/ncomms11360> PMID: 27094677; PubMed Central PMCID: PMC4843002.
  23. Ismail-Ali A, Fansa EK, Pryk N, Yahiaoui S, Kushnir S, Pflieger M, et al. Biosynthesis-driven structure–activity relationship study of premonensin-derivatives. *Organic & Biomolecular Chemistry*. 2016; 14(32):7671–5. <https://doi.org/10.1039/c6ob01201a> PMID: 27452503
  24. Leung EL, Luo LX, Li Y, Liu ZQ, Li LL, Shi DF, et al. Identification of a new inhibitor of KRAS-PDEδ interaction targeting KRAS mutant nonsmall cell lung cancer. *International journal of cancer*. 2019; 145(5):1334–45. Epub 2019/02/21. <https://doi.org/10.1002/ijc.32222> PMID: 30786019.
  25. Leung EL-H, Luo LX, Li Y, Liu Z-Q, Li LL, Shi DF, et al. Identification of a new inhibitor of KRAS-PDEδ interaction targeting KRAS mutant nonsmall cell lung cancer. *International journal of cancer*. 2019; 145(5):1334–45. <https://doi.org/10.1002/ijc.32222> PMID: 30786019
  26. Siddiqui FA, Alam C, Rosenqvist P, Ora M, Sabt A, Manoharan GB, et al. PDE6D Inhibitors with a New Design Principle Selectively Block K-Ras Activity. *ACS omega* [Internet]. 2020 2020/01//; 5(1):[832–42 pp.]. Available from: <http://europepmc.org/abstract/MED/31956834> <https://pubs.acs.org/doi/pdf/10.1021/acsomega.9b03639> <https://doi.org/10.1021/acsomega.9b03639> <https://europepmc.org/articles/PMC6964506> <https://europepmc.org/articles/PMC6964506?pdf=render>. PMID: 31956834
  27. Rosenqvist P, Sabt A, Dyunyasheva V, Abankwa D, Virta P, Ora M. Stability of the Phosphotriester PDE6D Inhibitors. *ChemistrySelect* 2021; 6(3):488–93. <https://doi.org/10.1002/slct.202004426>
  28. Chen YX, Koch S, Uhlenbrock K, Weise K, Das D, Gremer L, et al. Synthesis of the Rheb and K-Ras4B GTPases. *Angewandte Chemie (International ed in English)*. 2010; 49(35):6090–5. Epub 2010/07/24. <https://doi.org/10.1002/anie.201001884> PMID: 20652921.
  29. Chen L, Zhuang C, Lu J, Jiang Y, Sheng C. Discovery of Novel KRAS-PDEδ Inhibitors by Fragment-Based Drug Design. *Journal of Medicinal Chemistry*. 2018; 61(6):2604–10. <https://doi.org/10.1021/acs.jmedchem.8b00057> PMID: 29510040
  30. Martín-Gago P, Fansa EK, Klein CH, Murarka S, Janning P, Schürmann M, et al. A PDE6δ-KRas Inhibitor Chemotype with up to Seven H-Bonds and Picomolar Affinity that Prevents Efficient Inhibitor Release by Arl2. *Angewandte Chemie (International ed in English)*. 2017; 56(9):2423–8. Epub 2017/01/21. <https://doi.org/10.1002/anie.201610957> PMID: 28106325.

31. El Rhabori S, El Aissouq A, Chtita S, Khalil F. Design of novel quinoline derivatives as antibreast cancer using 3D-QSAR, molecular docking and pharmacokinetic investigation. *Anti-Cancer Drugs*. 2022; 33(9):789–802. <https://doi.org/10.1097/CAD.0000000000001318> PMID: 36136985-202210000-00002.
32. Mkhayar K, Elkhatabi K, Elkhatabi R, Haloui R, Daoui O, Edache EI, et al. Evaluation of dimedone-derived compounds as inhibitors against human colon cancer: Insights from 2D-QSAR, ADMET prediction, Osiris, Molinspiration, and molecular modeling. *Chinese Journal of Analytical Chemistry*. 2023; 51(11):100330. <https://doi.org/10.1016/j.cjac.2023.100330>
33. Chahbaoui N, Khamouli S, Alaqrabeh M, Belaidi S, Sinha L, Chtita S, et al. Identification of novel curcumin derivatives against pancreatic cancer: a comprehensive approach integrating 3D-QSAR pharmacophore modeling, virtual screening, and molecular dynamics simulations. *Journal of Biomolecular Structure and Dynamics*. 1-19. <https://doi.org/10.1080/07391102.2023.2266502> PMID: 37811784
34. Daoui O, Nour H, Abchir O, Elkhatabi S, Bakhouch M, Chtita S. A computer-aided drug design approach to explore novel type II inhibitors of c-Met receptor tyrosine kinase for cancer therapy: QSAR, molecular docking, ADMET and molecular dynamics simulations. *Journal of Biomolecular Structure and Dynamics*. 2023; 41(16):7768–85. <https://doi.org/10.1080/07391102.2022.2124456> PMID: 36120976
35. Koleva BB, Nikolova R, Kolev T, Mayer-Figge H, Spiteller M, Sheldrick WS. Hydrogensquarates of 3-nicotinoyl and 3-isonicotinoyl coumarin—crystal structures and spectroscopic elucidation. *Spectrochim Acta A Mol Biomol Spectrosc*. 2009; 73(1):72–8. Epub 2009/03/06. <https://doi.org/10.1016/j.saa.2009.01.032> PMID: 19261542.
36. Khan SA, Rizwan K, Shahid S, Noamaan MA, Rasheed T, Amjad H. Synthesis, DFT, computational exploration of chemical reactivity, molecular docking studies of novel formazan metal complexes and their biological applications. *Applied Organometallic Chemistry*. 2020; 34(3):e5444. <https://doi.org/10.1002/aoc.5444>
37. Pearson RG. Absolute electronegativity and hardness correlated with molecular orbital theory. *Proceedings of the National Academy of Sciences of the United States of America*. 1986; 83(22):8440–1. Epub 1986/11/01. <https://doi.org/10.1073/pnas.83.22.8440> PMID: 16578791; PubMed Central PMCID: PMC386945.
38. Günay N, Pir H, Avci D, Atalay Y. NLO and NBO Analysis of Sarcosine-Maleic Acid by Using HF and B3LYP Calculations. *Journal of Chemistry*. 2013; 2013:712130. <https://doi.org/10.1155/2013/712130>
39. Agbektas T, Zontul C, Ozturk A, Huseynzada A, Ganbarova R, Hasanova U, et al. Effect of azomethine group containing compounds on gene profiles in Wnt and MAPK signal patterns in lung cancer cell line: In silico and in vitro analyses. *Journal of Molecular Structure*. 2023; 1275. <https://doi.org/10.1016/j.molstruc.2022.134619>
40. Chalkha M, Nour H, Chebbac K, Nakkabi A, Bahsis L, Bakhouch M, et al. Synthesis, Characterization, DFT Mechanistic Study, Antimicrobial Activity, Molecular Modeling, and ADMET Properties of Novel Pyrazole-isoxazoline Hybrids. *ACS Omega*. 2022; 7(50):46731–44. <https://doi.org/10.1021/acsomega.2c05788> PMID: 36570248
41. Parr RG, Weitao Y. *Density-Functional Theory of Atoms and Molecules*: Oxford University Press; 1994.
42. Defranceschi M, Bris CL. *Mathematical Models and Methods for Ab Initio Quantum Chemistry*: Springer Berlin Heidelberg; 2000.
43. Mendoza-Huizar LH, Rios-Reyes CHJotMCS. Chemical reactivity of atrazine employing the Fukui function. *Journal of the Mexican Chemical Society*. 2011; 55(3):142–7.
44. Geerlings P, De Proft F, Langenaeker W. Conceptual Density Functional Theory. *Chemical Reviews*. 2003; 103(5):1793–874. <https://doi.org/10.1021/cr990029p> PMID: 12744694
45. Chattaraj PK, Roy DR. Update 1 of: Electrophilicity Index. *Chemical Reviews*. 2007; 107(9):PR46–PR74. <https://doi.org/10.1021/cr078014b>
46. Parr RG, Yang W. Density functional approach to the frontier-electron theory of chemical reactivity. *Journal of the American Chemical Society*. 1984; 106(14):4049–50. <https://doi.org/10.1021/ja00326a036>
47. Shu-Bin LIU. Conceptual Density Functional Theory and Some Recent Developments. *Acta Physico-Chimica Sinica*. 2009; 25(03):590–600. <https://doi.org/10.3866/pku.Whxb20090332>
48. Parr RG, Pearson RG. Absolute hardness: companion parameter to absolute electronegativity. *Journal of the American Chemical Society*. 1983; 105(26):7512–6. <https://doi.org/10.1021/ja00364a005>
49. Chattaraj PK, Giri S. Stability, reactivity, and aromaticity of compounds of a multivalent superatom. *The journal of physical chemistry A*. 2007; 111(43):11116–21. Epub 2007/10/06. <https://doi.org/10.1021/jp0760758> PMID: 17915847.

50. Contreras RR, Fuentealba P, Galván M, Pérez P. A direct evaluation of regional Fukui functions in molecules. 1999; 304:405–13. [https://doi.org/10.1016/s0009-2614\(99\)00325-5](https://doi.org/10.1016/s0009-2614(99)00325-5)
51. Morell C, Grand A, Toro-Labbé A. New dual descriptor for chemical reactivity. The journal of physical chemistry A. 2005; 109(1):205–12. Epub 2006/07/15. <https://doi.org/10.1021/jp046577a> PMID: 16839107.
52. Parthasarathi R, Padmanabhan J, Elango M, Subramanian V, Chattaraj PK. Intermolecular reactivity through the generalized philicity concept. Chemical Physics Letters. 2004; 394(4–6):225–30. <https://doi.org/10.1016/j.cplett.2004.07.002>
53. Lee C, Yang W, Parr RG. Local softness and chemical reactivity in the molecules CO, SCN<sup>−</sup> and H<sub>2</sub>CO. Journal of Molecular Structure: THEOCHEM. 1988; 163:305–13. [https://doi.org/10.1016/0166-1280\(88\)80397-X](https://doi.org/10.1016/0166-1280(88)80397-X)
54. Lu T, Chen F. Multiwfn: A multifunctional wavefunction analyzer. International Journal of Quantum Chemistry. 2012; 33(5):580–92. <https://doi.org/10.1002/jcc.22885> PMID: 22162017
55. Naray-Szabo G, Ferenczy GG. Molecular Electrostatics. Chemical Reviews. 1995; 95(4):829–47. <https://doi.org/10.1021/cr00036a002>
56. Murray JS, Politzer P. The electrostatic potential: an overview. WIREs Computational Molecular Science. 2011; 1(2):153–63. <https://doi.org/10.1002/wcms.19>
57. Luque FJ, López JM, Orozco M. Perspective on “Electrostatic interactions of a solute with a continuum. A direct utilization of ab initio molecular potentials for the prevision of solvent effects”. Theoretical Chemistry Accounts. 2000; 103(3):343–5. <https://doi.org/10.1007/s002149900013>
58. Andrási M, Buglyó P, Zekany L, Gaspar A. A comparative study of capillary zone electrophoresis and pH-potentiometry for determination of dissociation constants. Journal of pharmaceutical and biomedical analysis. 2007; 44(5):1040–7. Epub 2007/06/01. <https://doi.org/10.1016/j.jpba.2007.04.024> PMID: 17537608.
59. Khaled DM, Elshakre ME, Noamaan MA, Butt H, Abdel Fattah MM, Gaber DA. A Computational QSAR, Molecular Docking and In Vitro Cytotoxicity Study of Novel Thiouracil-Based Drugs with Anticancer Activity against Human-DNA Topoisomerase II. International journal of molecular sciences. 2022; 23(19). Epub 2022/10/15. <https://doi.org/10.3390/ijms231911799> PMID: 36233102; PubMed Central PMCID: PMC9570267.
60. Di L, Kerns EH. Drug-like properties: concepts, structure design and methods from ADME to toxicity optimization: Academic press; 2015.
61. Elshakre ME, Noamaan MA, Moustafa H, Butt H. Density Functional Theory, Chemical Reactivity, Pharmacological Potential and Molecular Docking of Dihydrothiouracil-Indenopyridopyrimidines with Human-DNA Topoisomerase II. International journal of molecular sciences. 2020; 21(4). Epub 2020/02/20. <https://doi.org/10.3390/ijms21041253> PMID: 32070048; PubMed Central PMCID: PMC7072893.
62. Belaidi S, Belaidi H, Bouzidi DJJoC, Nanoscience T. Computational methods applied in physical-chemistry property relationships of thiophene derivatives. 2015; 12(8):1737–45.
63. Nour H, Hashmi MA, Belaidi S, Errougui A, El Kouali M, Talbi M, et al. Design of Acetylcholinesterase Inhibitors as Promising Anti-Alzheimer's Agents Based on QSAR, Molecular Docking, and Molecular Dynamics Studies of Liquiritigenin Derivatives. ChemistrySelect 2023; 8(32):e202301466. <https://doi.org/10.1002/slct.202301466>
64. Yamari I, Abchir O, Mali SN, Errougui A, Talbi M, Kouali ME, et al. The anti-SARS-CoV-2 activity of novel 9, 10-dihydrophenanthrene derivatives: an insight into molecular docking, ADMET analysis, and molecular dynamics simulation. Sci Afr. 2023; 21:e01754. Epub 2023/06/19. <https://doi.org/10.1016/j.sciaf.2023.e01754> PMID: 37332393; PubMed Central PMCID: PMC10260260.
65. Issahaku AR, Mukelabai N, Agoni C, Rudrapal M, Aldosari SM, Almalki SG, et al. Characterization of the binding of MRTX1133 as an avenue for the discovery of potential KRASG12D inhibitors for cancer therapy. Scientific Reports. 2022; 12(1):17796. <https://doi.org/10.1038/s41598-022-22668-1> PMID: 36273239
66. Rudrapal M, Eltayeb WA, Rakshit G, El-Arabey AA, Khan J, Aldosari SM, et al. Dual synergistic inhibition of COX and LOX by potential chemicals from Indian daily spices investigated through detailed computational studies. Scientific Reports. 2023; 13(1):8656. <https://doi.org/10.1038/s41598-023-35161-0> PMID: 37244921
67. Robb M, Cheeseman J, Scalmani G, Barone V, Mennucci B, Petersson G, et al. Gaussian 09, Revision C. 01, Gaussian. 2009.
68. Chai J-D, Head-Gordon M. Long-range corrected hybrid density functionals with damped atom–atom dispersion corrections. Physical Chemistry Chemical Physics. 2008; 10(44):6615–20. <https://doi.org/10.1039/b810189b> PMID: 18989472

69. McLean AD, Chandler GS. Contracted Gaussian basis sets for molecular calculations. I. Second row atoms,  $Z = 11-18$ . 1980; 72:5639–48. <https://doi.org/10.1063/1.438980>
70. Ulic SE, Della Védova CO, Hermann A, Mack HG, Oberhammer H. Preparation and properties of trifluorothioacetic acid-S-(trifluoromethyl)ester,  $\text{CF}_3\text{C}(\text{O})\text{SCF}_3$ . The journal of physical chemistry A. 2008; 112(27):6211–6. Epub 2008/06/13. <https://doi.org/10.1021/jp800344m> PMID: 18547036.
71. Reed AE, Weinhold F. Natural bond orbital analysis of near-Hartree–Fock water dimer. The Journal of Chemical Physics. 1983; 78(6):4066–73. <https://doi.org/10.1063/1.445134> % J The Journal of Chemical Physics
72. Lin Y-S, Li G-D, Mao S-P, Chai J-D. Long-Range Corrected Hybrid Density Functionals with Improved Dispersion Corrections. Journal of Chemical Theory and Computation. 2013; 9(1):263–72. <https://doi.org/10.1021/ct300715s> PMID: 26589028
73. Humphrey W, Dalke A, Schulten K. VMD: visual molecular dynamics. Journal of molecular graphics. 1996; 14(1):33–8, 27–8. Epub 1996/02/01. [https://doi.org/10.1016/0263-7855\(96\)00018-5](https://doi.org/10.1016/0263-7855(96)00018-5) PMID: 8744570.
74. Dennington R, Keith T, Millam JJRM. GaussView, version 5, Semichem Inc., Shawnee Mission, KS, 2009. 2013;23.
75. Froimowitz M. HyperChem: a software package for computational chemistry and molecular modeling. BioTechniques. 1993; 14(6):1010–3. Epub 1993/06/01. PMID: 8333944.
76. Daina A, Michielin O, Zoete V. SwissADME: a free web tool to evaluate pharmacokinetics, drug-likeness and medicinal chemistry friendliness of small molecules. Scientific Reports. 2017; 7(1):42717. <https://doi.org/10.1038/srep42717> PMID: 28256516
77. Issahaku AR, Salifu EY, Agoni C, Alahmdi MI, Abo-Dya NE, Soliman MES, et al. Discovery of Potential KRAS-SOS1 Inhibitors from South African Natural Compounds: An In silico Approach. 2023; 8(24): e202300277. <https://doi.org/10.1002/slct.202300277>
78. Zimmermann G, Papke B, Ismail S, Vartak N, Chandra A, Hoffmann M, et al. Small molecule inhibition of the KRAS–PDEδ interaction impairs oncogenic KRAS signalling. Nature. 2013; 497(7451):638–42. <https://doi.org/10.1038/nature12205> PMID: 23698361
79. Case D, Darden T, Cheatham III T, Simmerling C, Wang J, Duke R, et al. (2012), AMBER 12, University of California, San Francisco. University of California San Francisco; 2012.
80. Systèmes DJSDDS. BIOVIA, discovery studio visualizer, release 2019. 2020.
81. Elsebaie HA, El-Bastawissy EA, Elberembally KM, Khaleel EF, Badi RM, Shaladam MA, et al. Novel 4-(2-arylidenehydrazineyl)thienopyrimidine derivatives as anticancer EGFR inhibitors: Design, synthesis, biological evaluation, kinome selectivity and in silico insights. Bioorganic Chemistry. 2023; 140:106799. <https://doi.org/10.1016/j.bioorg.2023.106799> PMID: 37625210
82. Abraham MJ, Murtola T, Schulz R, Páll S, Smith JC, Hess B, et al. GROMACS: High performance molecular simulations through multi-level parallelism from laptops to supercomputers. SoftwareX. 2015; 1–2:19–25. <https://doi.org/10.1016/j.softx.2015.06.001>
83. Pol-Fachin L, Fernandes CL, Verli H. GROMOS96 43a1 performance on the characterization of glyco-protein conformational ensembles through molecular dynamics simulations. Carbohydrate research. 2009; 344(4):491–500. Epub 2009/02/03. <https://doi.org/10.1016/j.carres.2008.12.025> PMID: 19185293.
84. Fadrná E, Hladecková K, Koca J. Long-range electrostatic interactions in molecular dynamics: an endothelin-1 case study. Journal of biomolecular structure & dynamics. 2005; 23(2):151–62. Epub 2005/08/03. <https://doi.org/10.1080/07391102.2005.10531229> PMID: 16060689.
85. Wang E, Sun H, Wang J, Wang Z, Liu H, Zhang JZH, et al. End-Point Binding Free Energy Calculation with MM/PBSA and MM/GBSA: Strategies and Applications in Drug Design. Chemical Reviews. 2019; 119(16):9478–508. <https://doi.org/10.1021/acs.chemrev.9b00055> PMID: 31244000
